# Supplementary material for: Stereoselective synthesis of the pyran subunit of portentol
Source: Royal Society of Chemistry journal article supplement (doi:10.1039/d5ob00235d), 2025-01-01

## Electronic Supplementary Information (ESI)

### Stereoselective Synthesis of the Pyran Subunit of Portentol†

Tan Hoang Luu,<sup>a,b</sup> Florian Heppner,<sup>a</sup> Johal Ruiz,<sup>a,c</sup> and Dirk Menche<sup>a,\*</sup>

*a* Kekulé Institute of Organic Chemistry and Biochemistry, University of Bonn, D-53121 Bonn, Germany, EU.

*b* Present address: Apurano Pharmaceuticals GmbH, D-83627 Warngau,, Germany.

*c* Present address: IIQ – CSIC, Sevilla - Spain.

E-mail: [dirk.menche@uni-bonn.de](mailto:dirk.menche@uni-bonn.de)

## Contents

Copies of <sup>1</sup>H and <sup>13</sup>C NMR spectra

S2

$^1\text{H-NMR}$ , 300 MHz,  $\text{CDCl}_3$ , 298 K

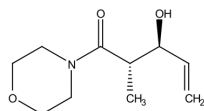

**9**

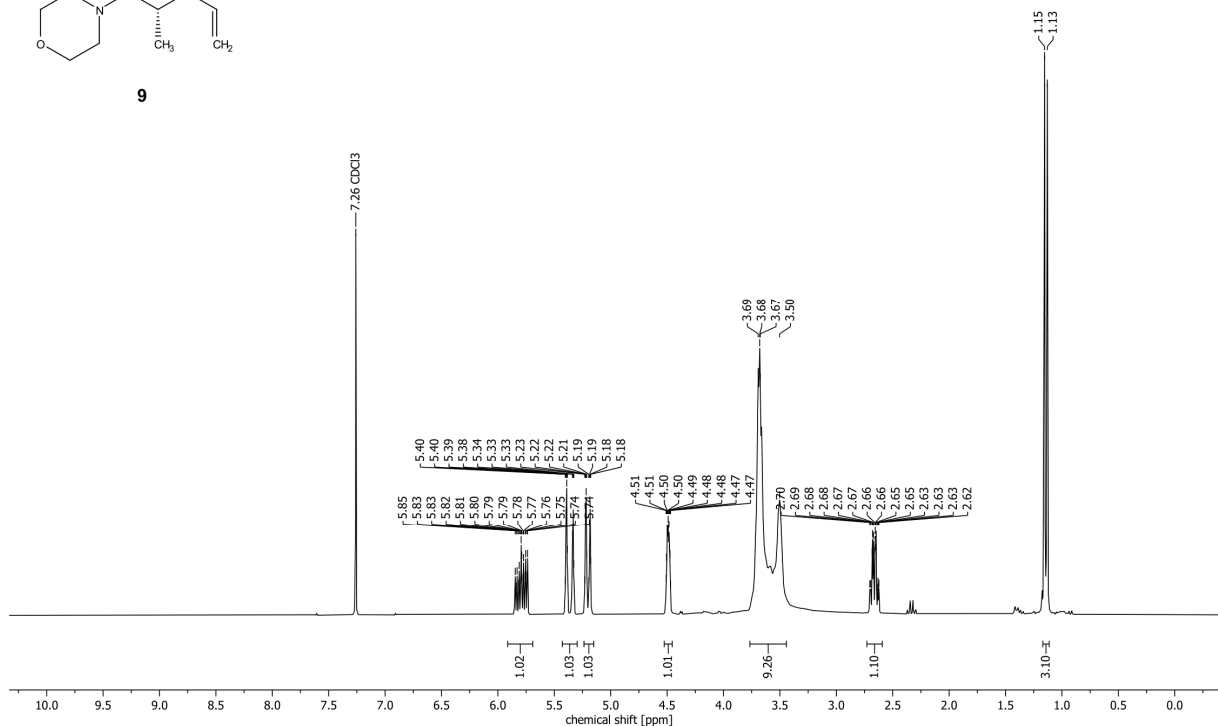

$^{13}\text{C-NMR}$ , 76 MHz,  $\text{CDCl}_3$ , 298 K

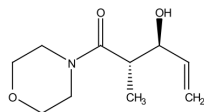

**9**

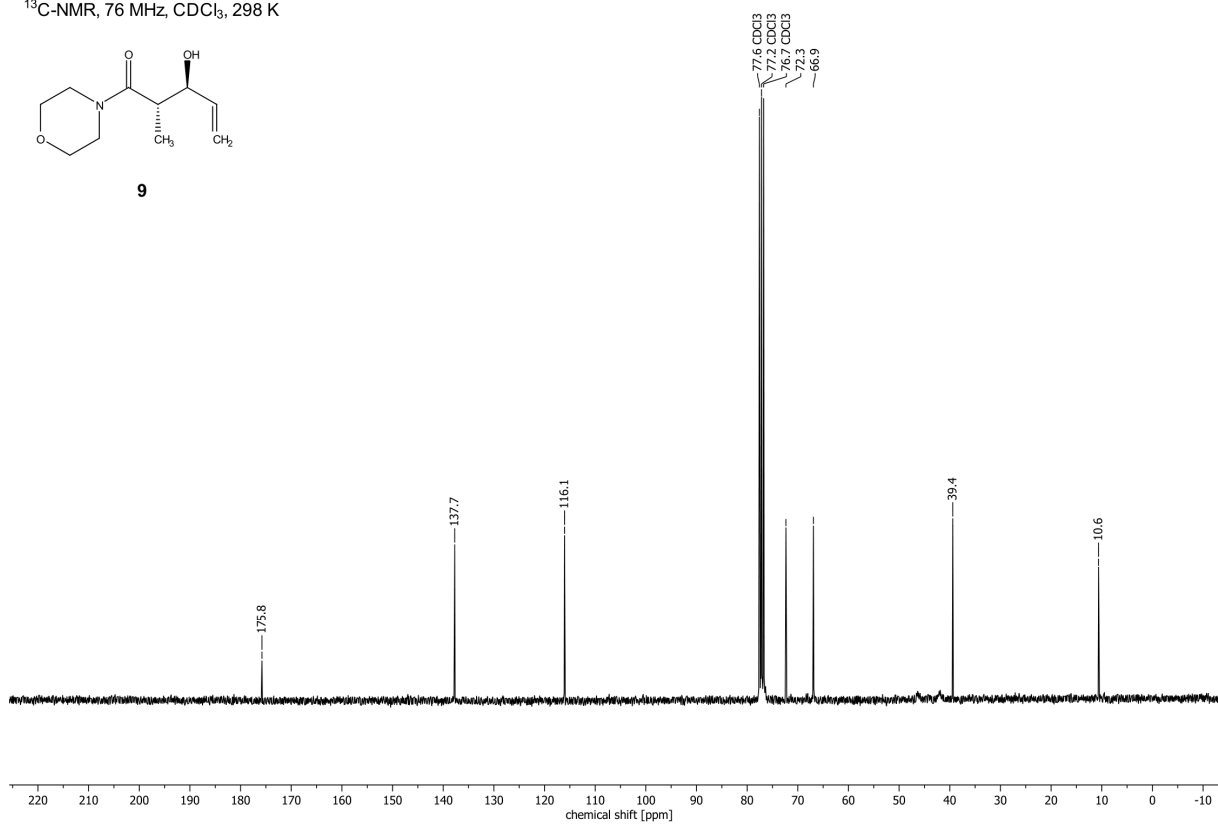

<sup>1</sup>H-NMR, 500 MHz, CDCl<sub>3</sub>, 298 K

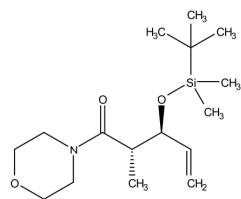

**10**

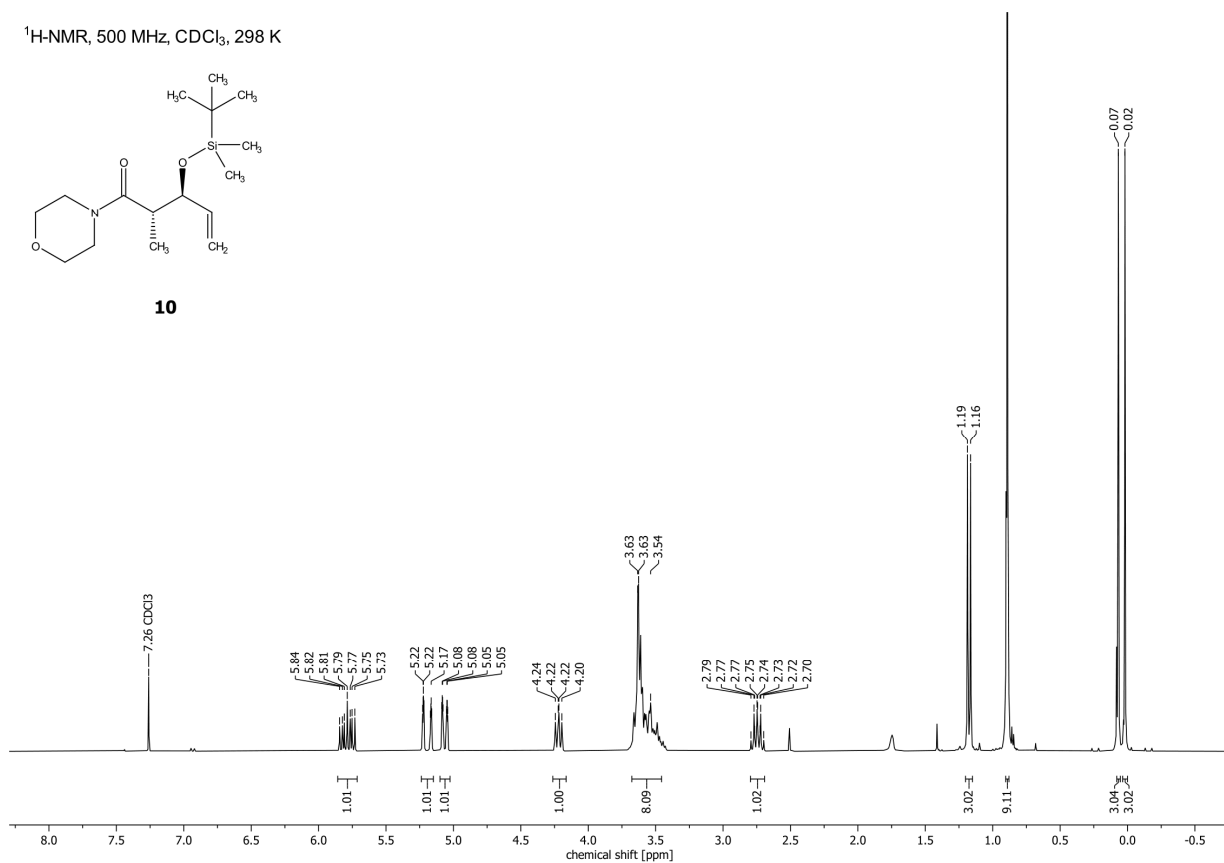

<sup>13</sup>C-NMR, 126 MHz, CDCl<sub>3</sub>, 298 K

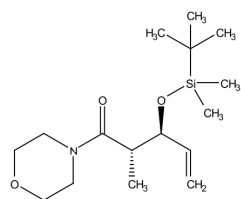

**10**

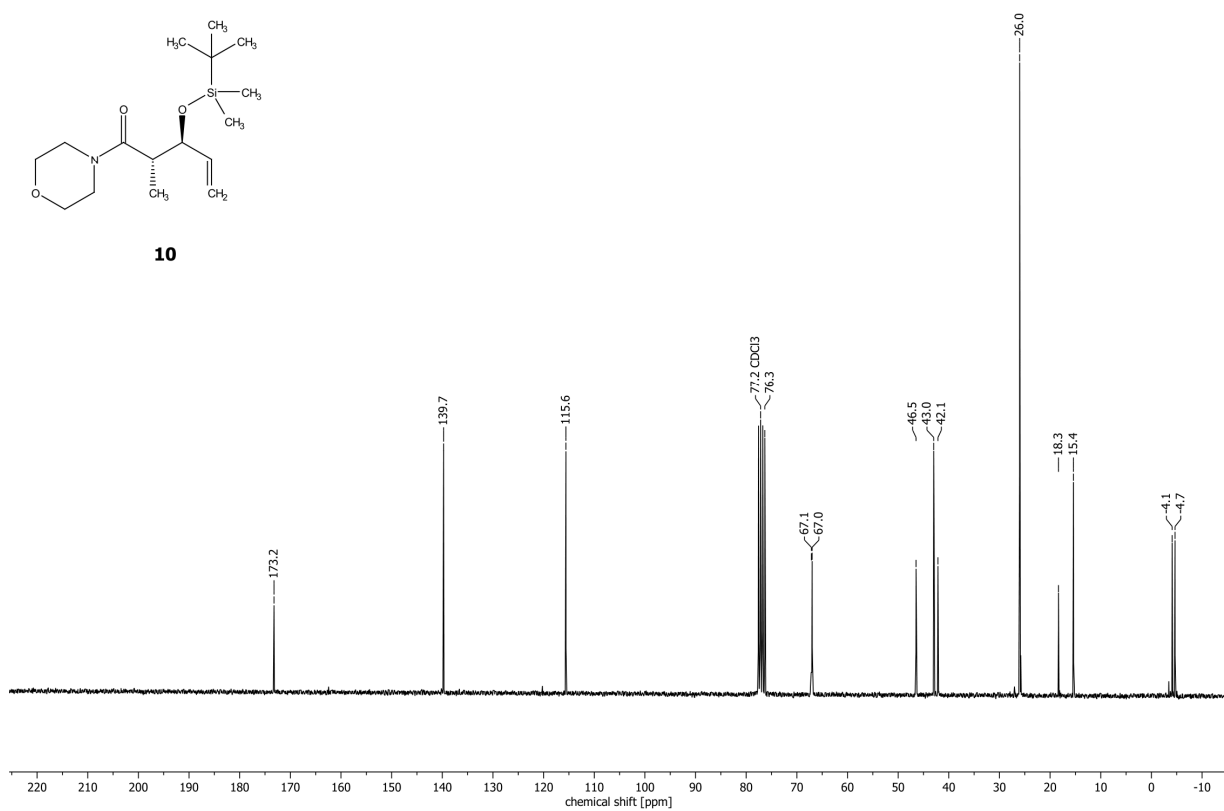

<sup>1</sup>H-NMR, 500 MHz, CDCl<sub>3</sub>, 298 K

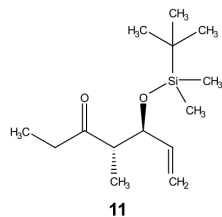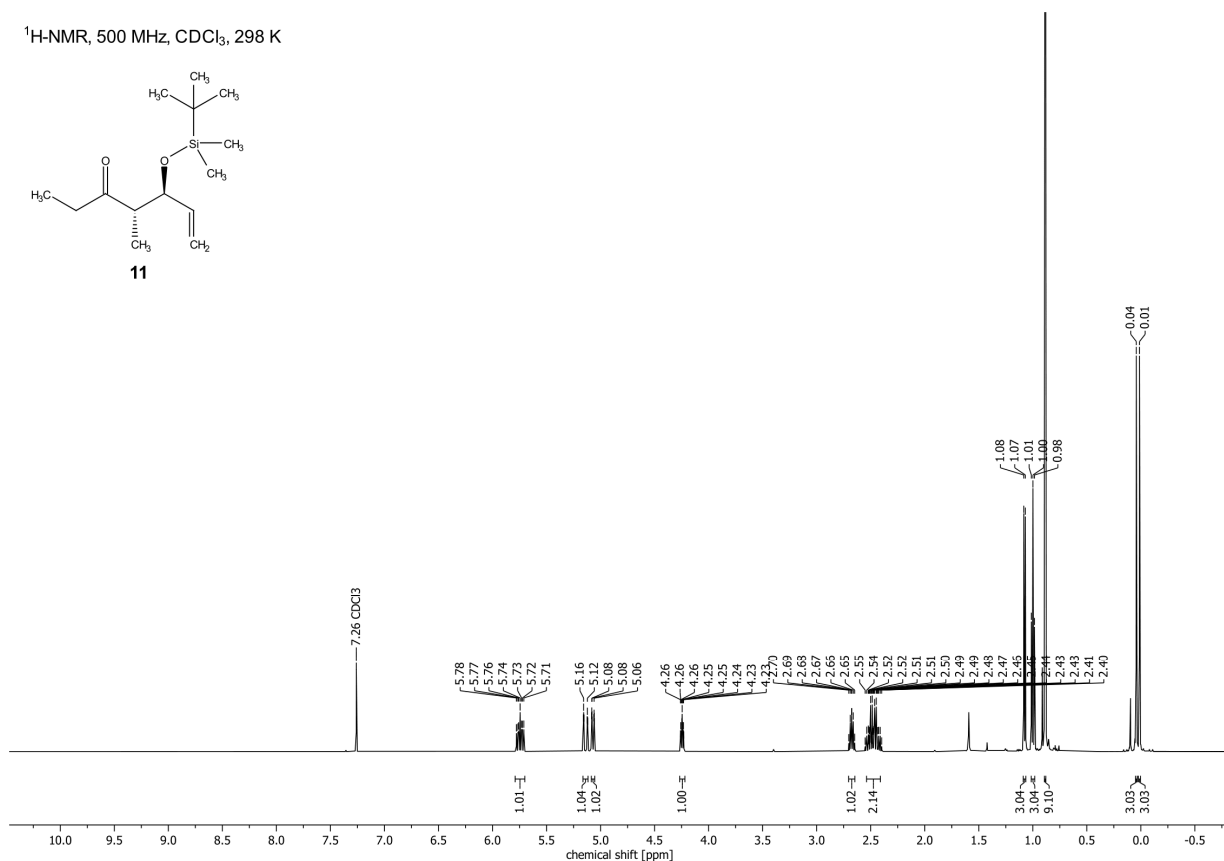

<sup>13</sup>C-NMR, 126 MHz, CDCl<sub>3</sub>, 298 K

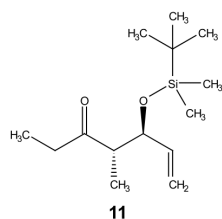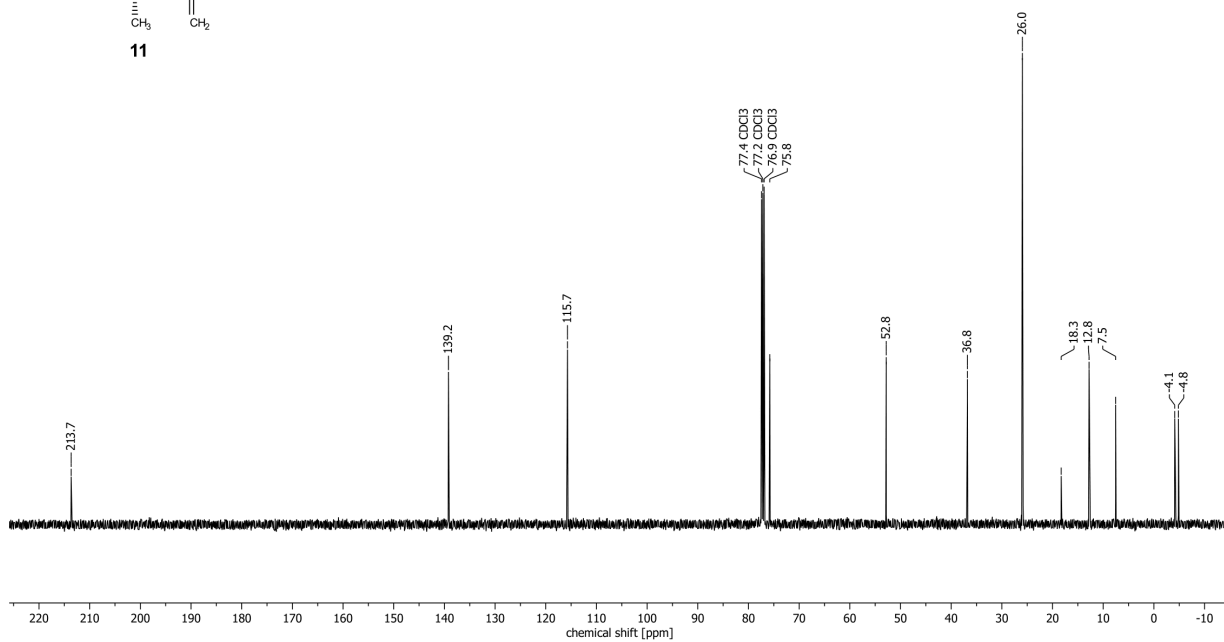

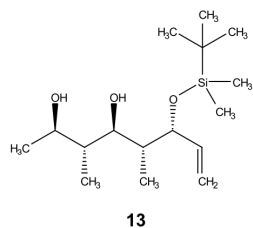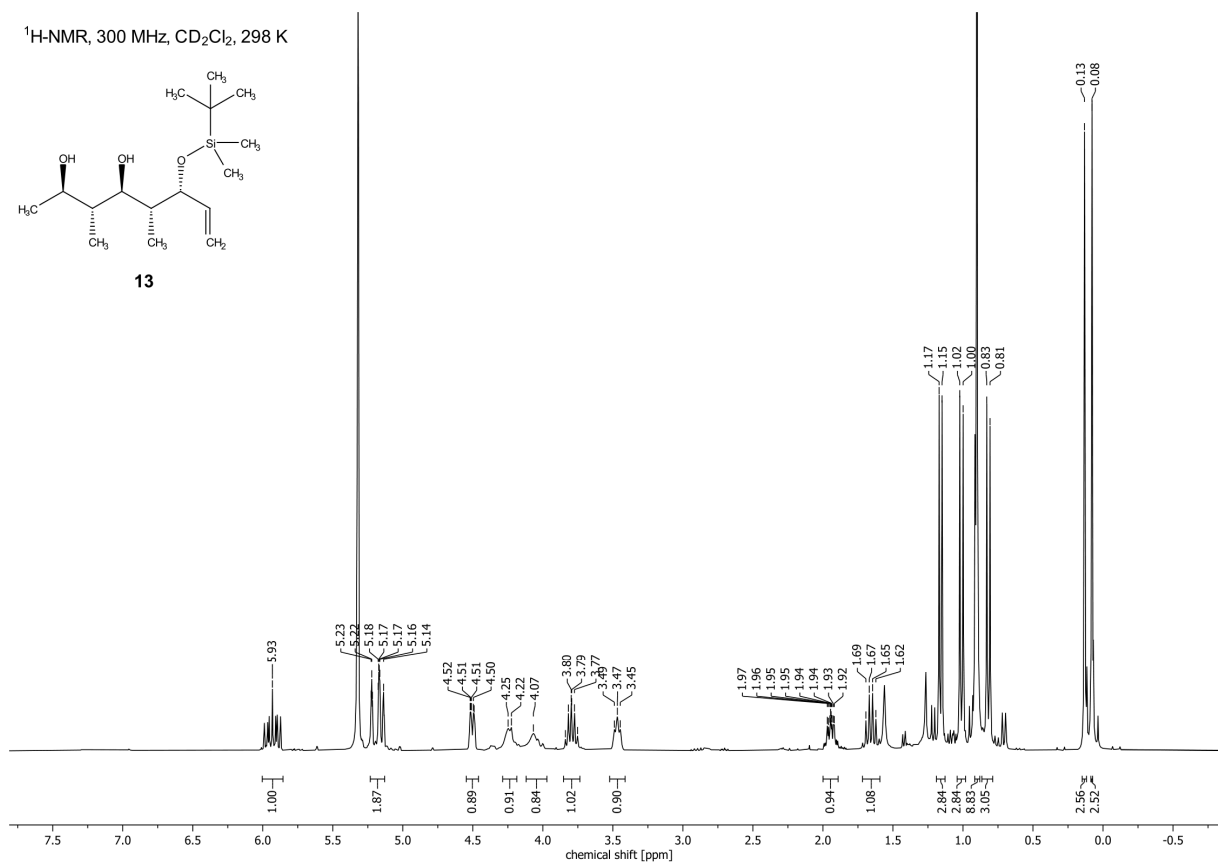

<sup>1</sup>H-NMR, 500 MHz, CD<sub>2</sub>Cl<sub>2</sub>, 298 K

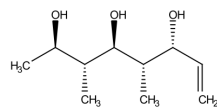

**14**

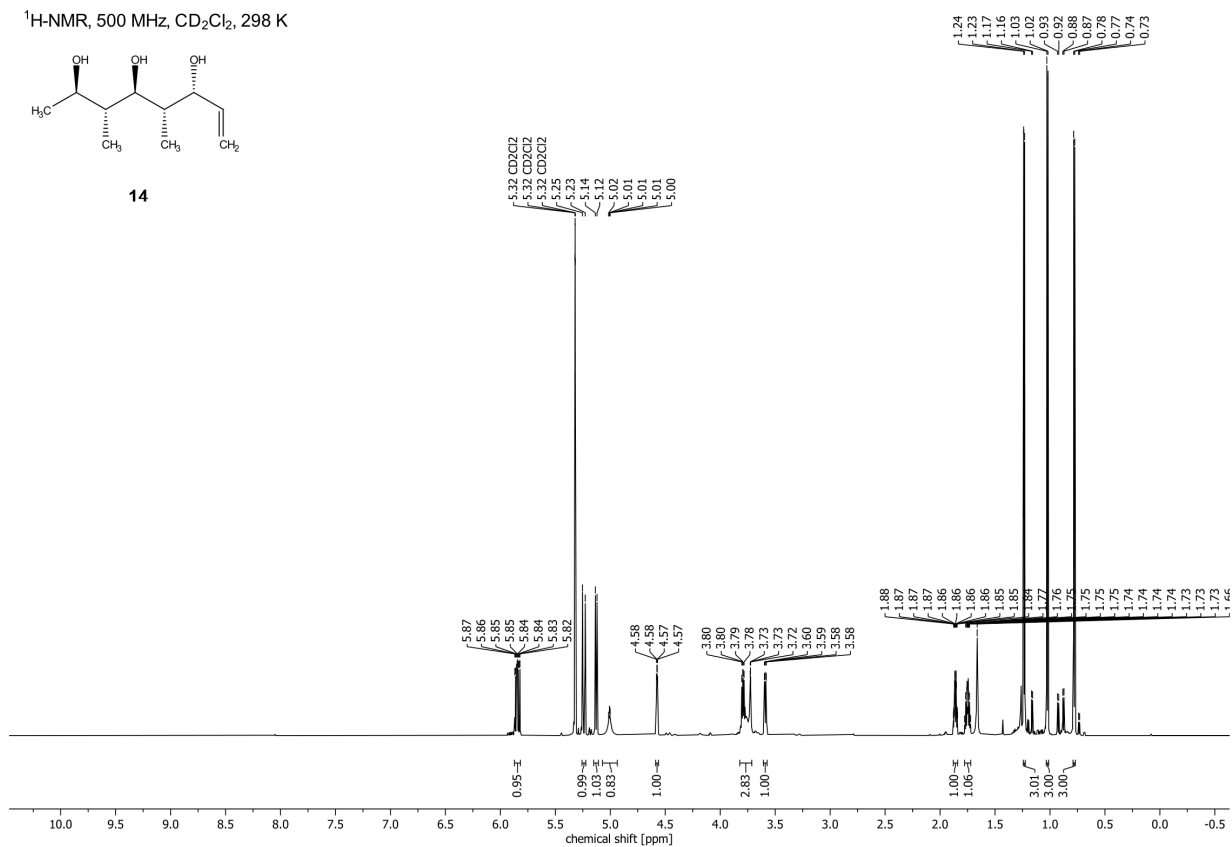

<sup>13</sup>C-NMR, 126 MHz, CD<sub>2</sub>Cl<sub>2</sub>, 298 K

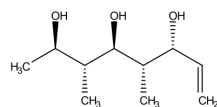

**14**

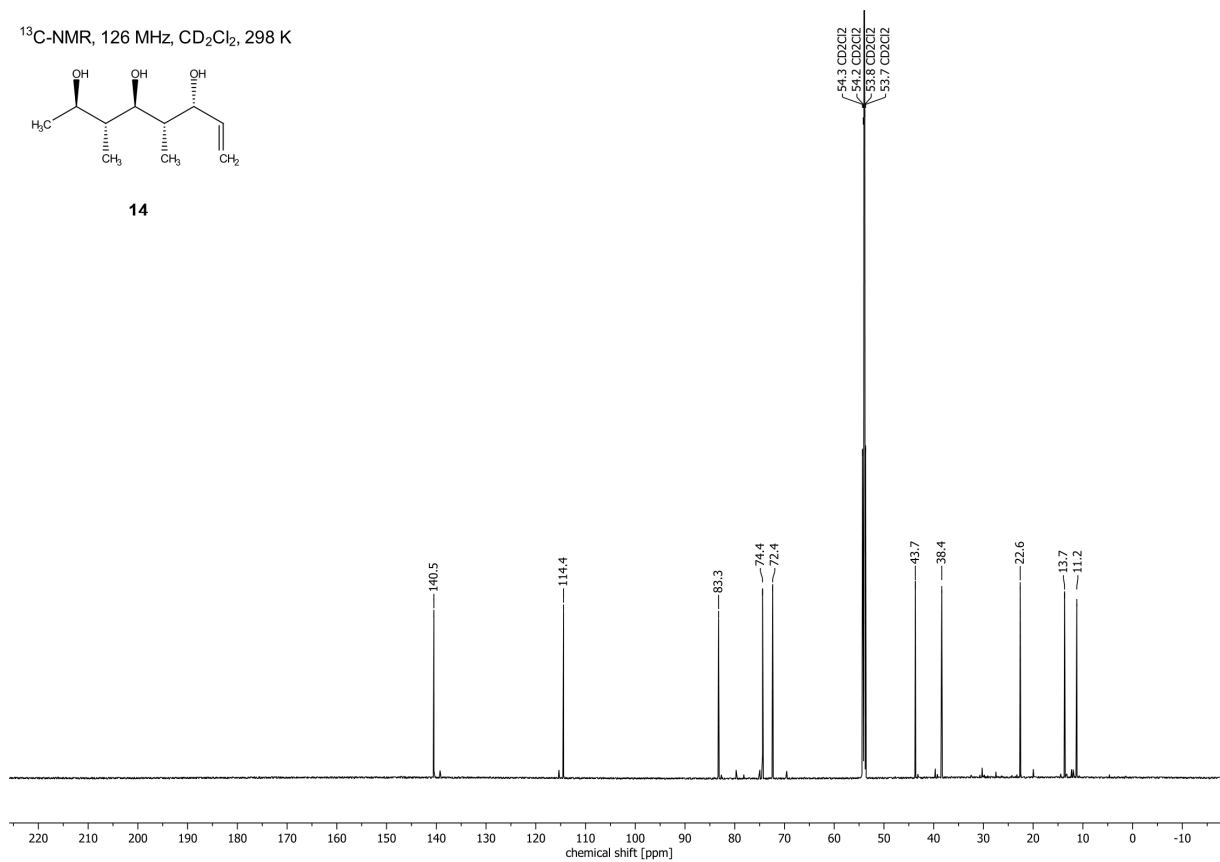

$^1\text{H-NMR}$ , 400 MHz,  $\text{CD}_2\text{Cl}_2$ , 298 K

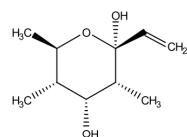

**15**

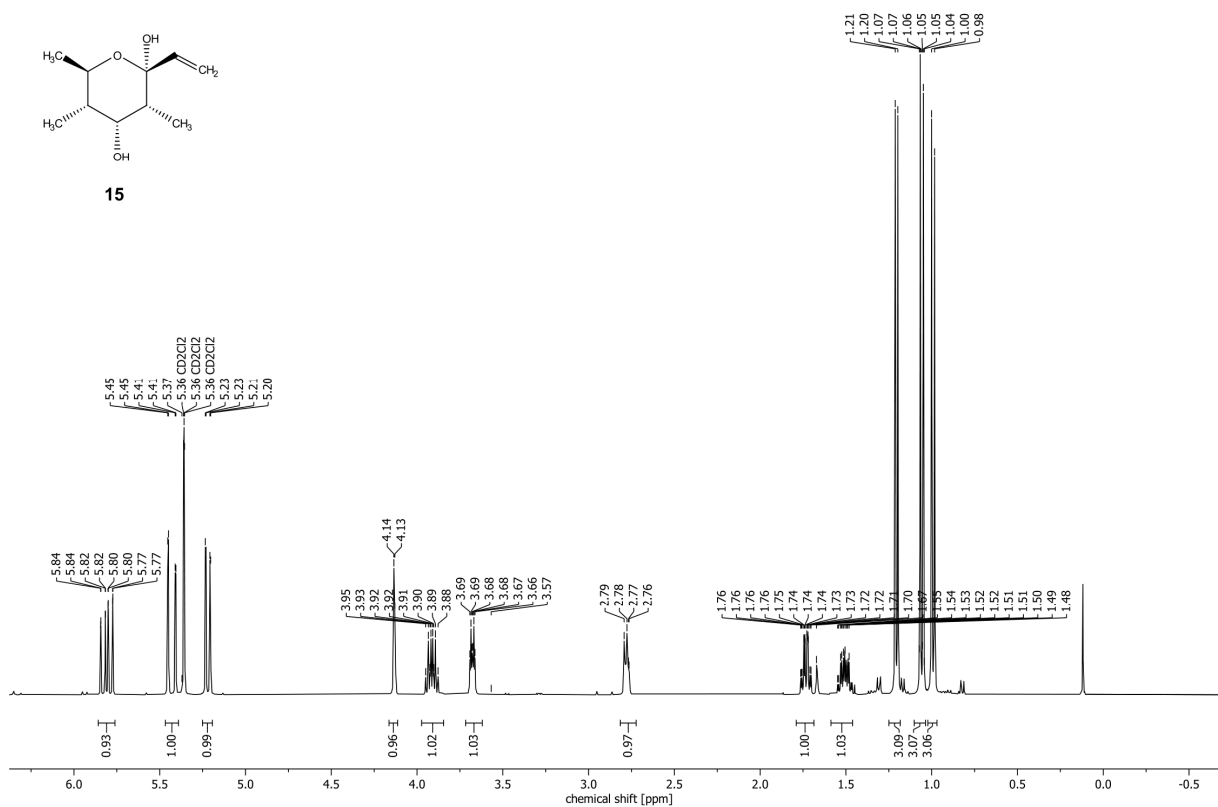

$^{13}\text{C-NMR}$ , 101 MHz,  $\text{CD}_2\text{Cl}_2$ , 298 K

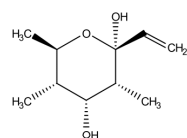

**15**

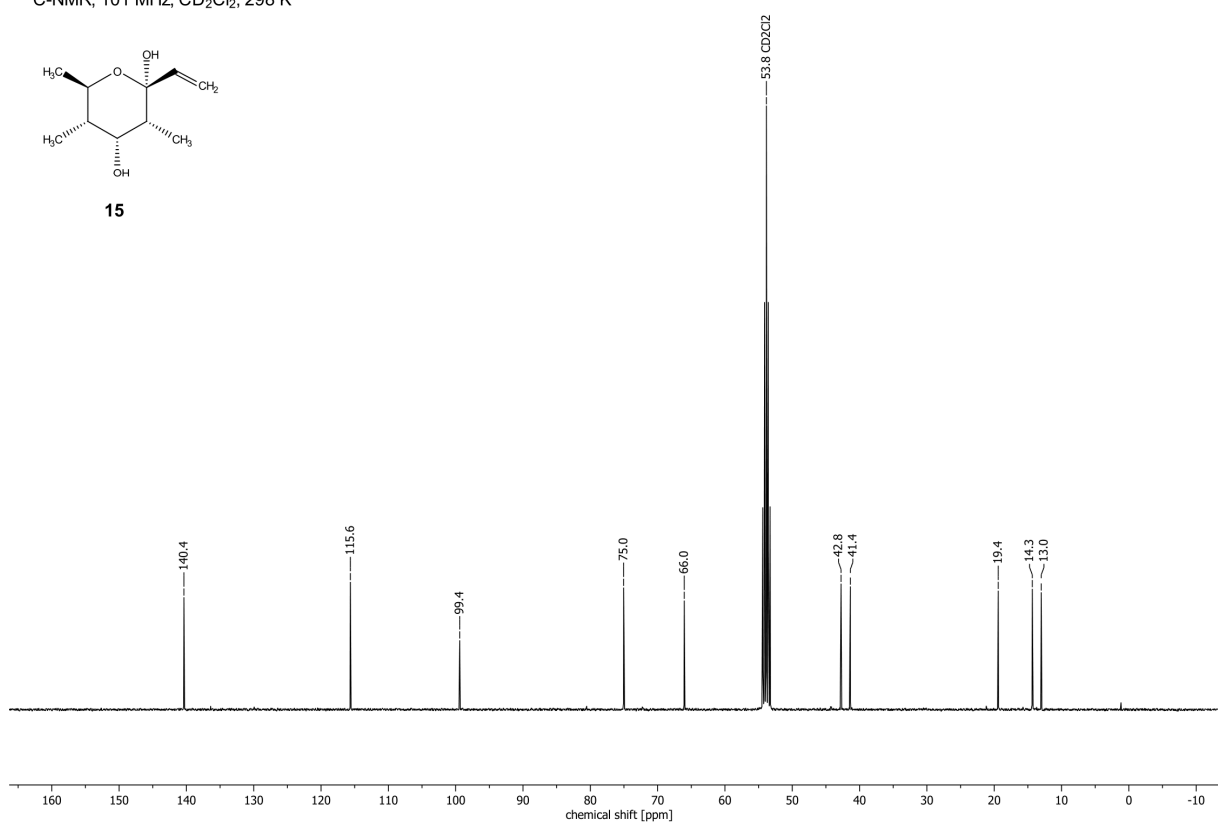

$^1\text{H-NMR}$ , 500 MHz,  $\text{CD}_2\text{Cl}_2$ , 298 K

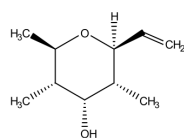

**16**

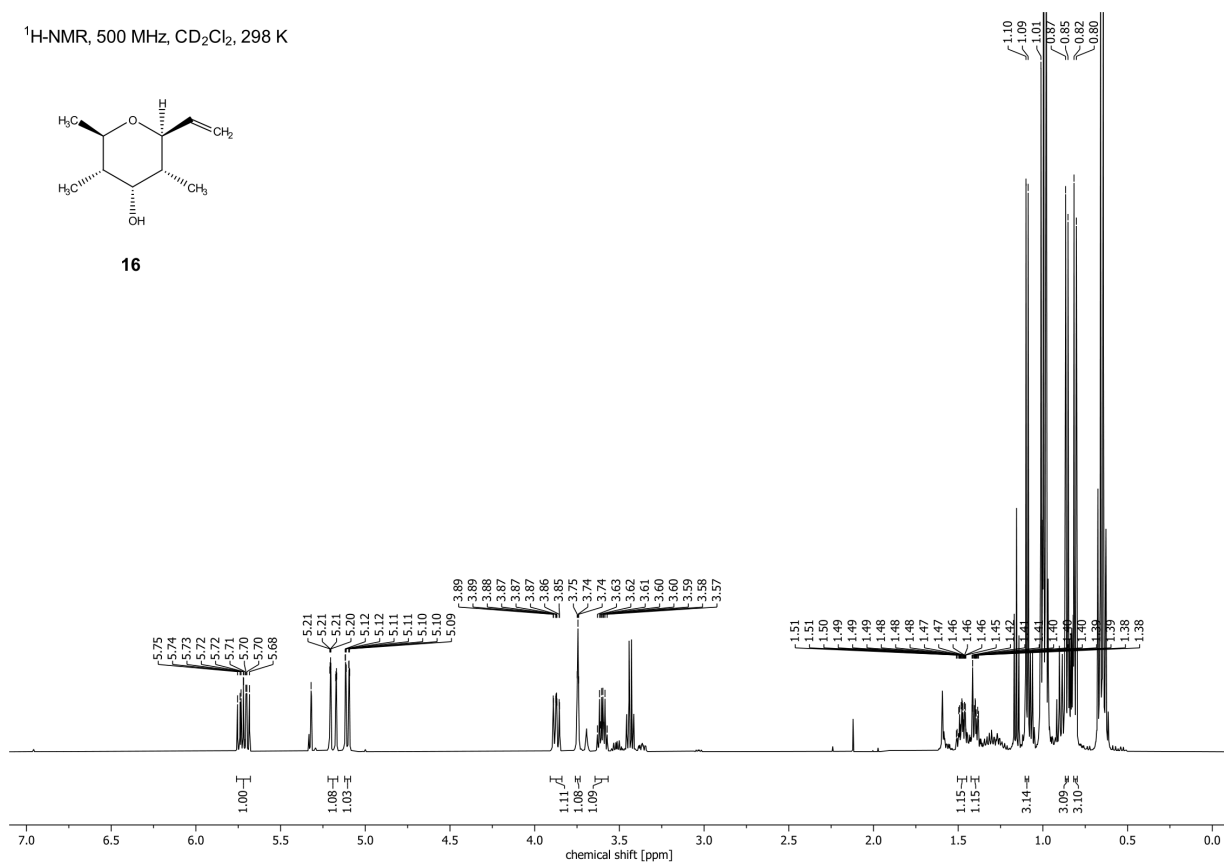

$^{13}\text{C-NMR}$ , 126 MHz,  $\text{CD}_2\text{Cl}_2$ , 298 K

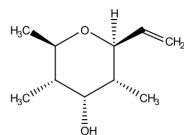

**16**

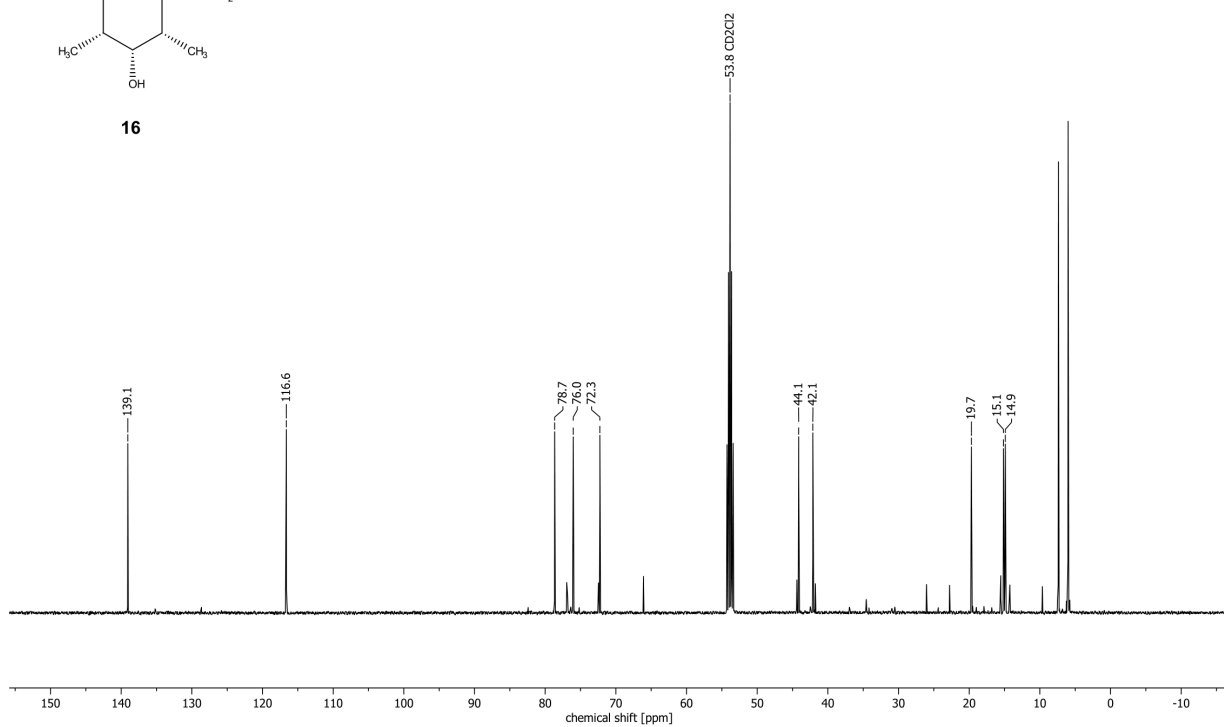



$^1\text{H-NMR}$ , 500 MHz,  $\text{CD}_2\text{Cl}_2$ , 298 K

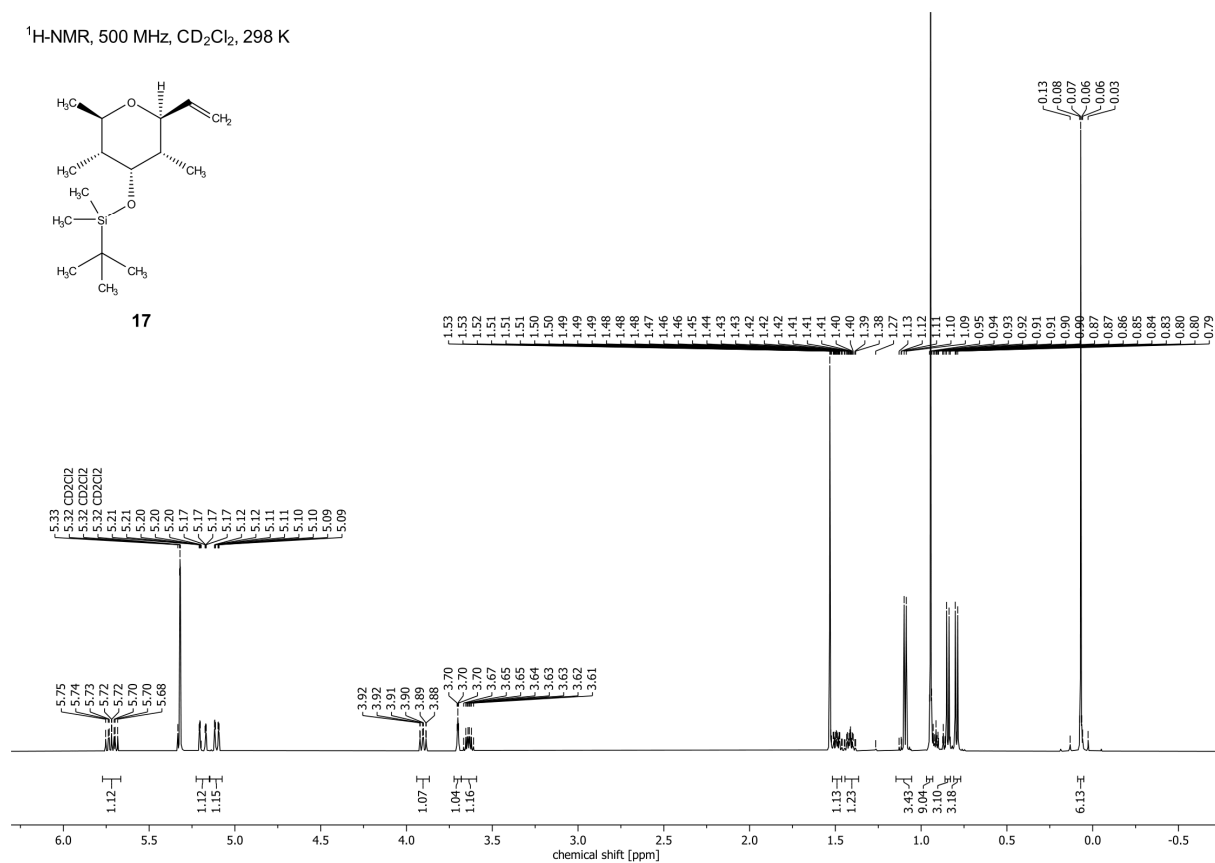

$^{13}\text{C-NMR}$ , 126 MHz,  $\text{CD}_2\text{Cl}_2$ , 298 K

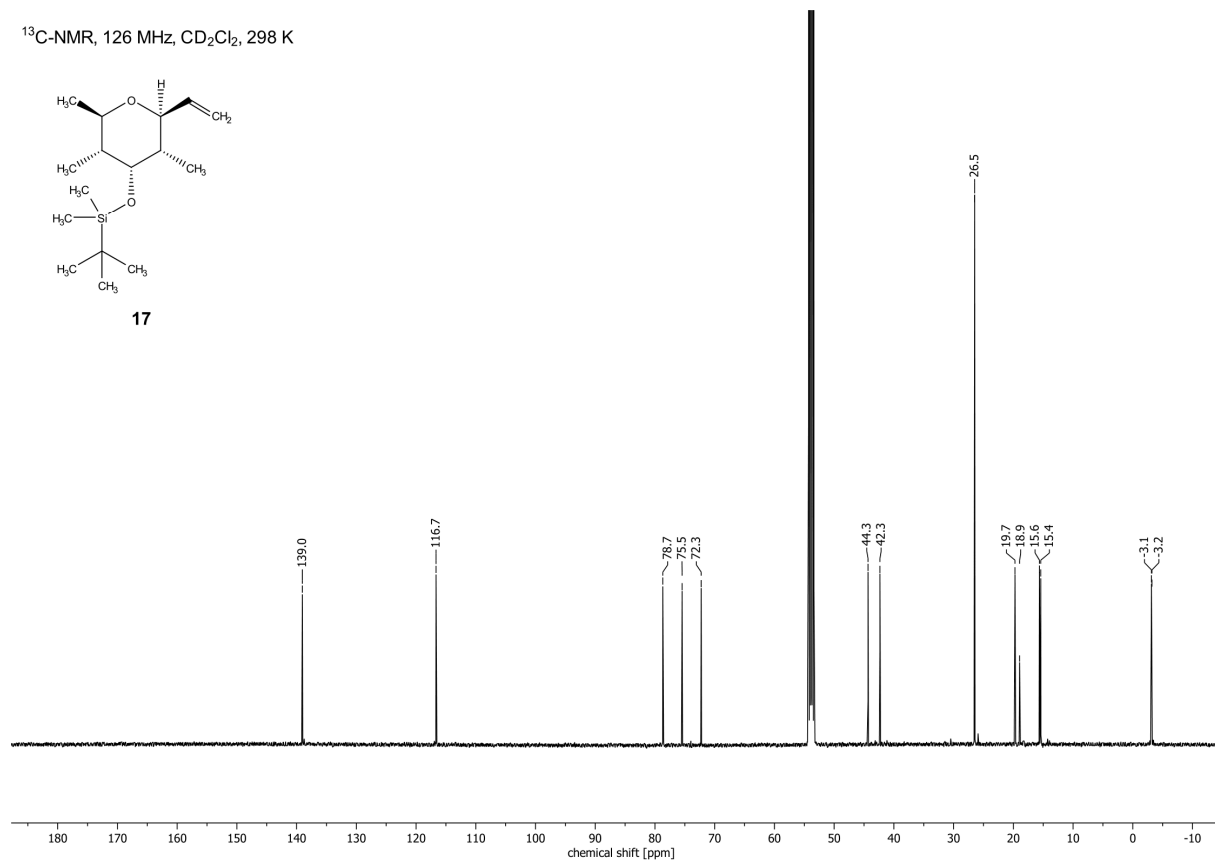

$^1\text{H-NMR}$ , 500 MHz,  $\text{CD}_2\text{Cl}_2$ , 298 K

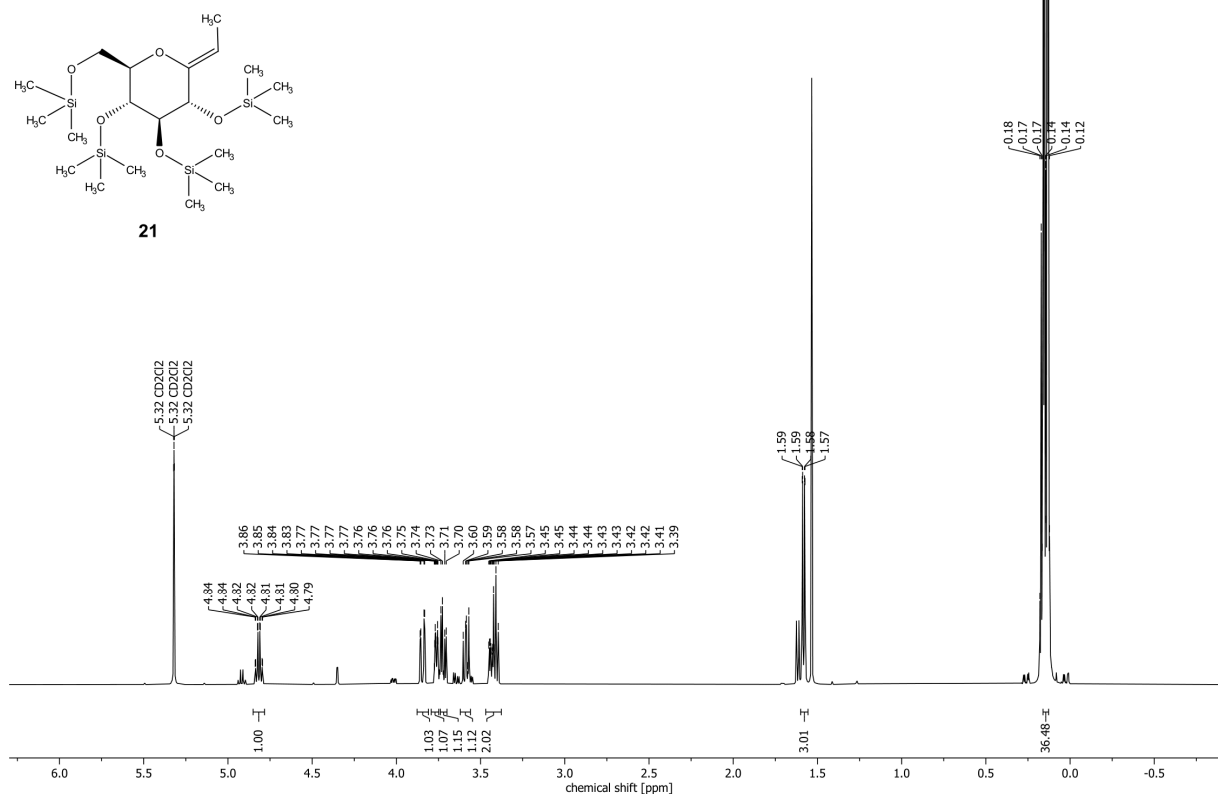

$^{13}\text{C-NMR}$ , 126 MHz,  $\text{CD}_2\text{Cl}_2$ , 298 K

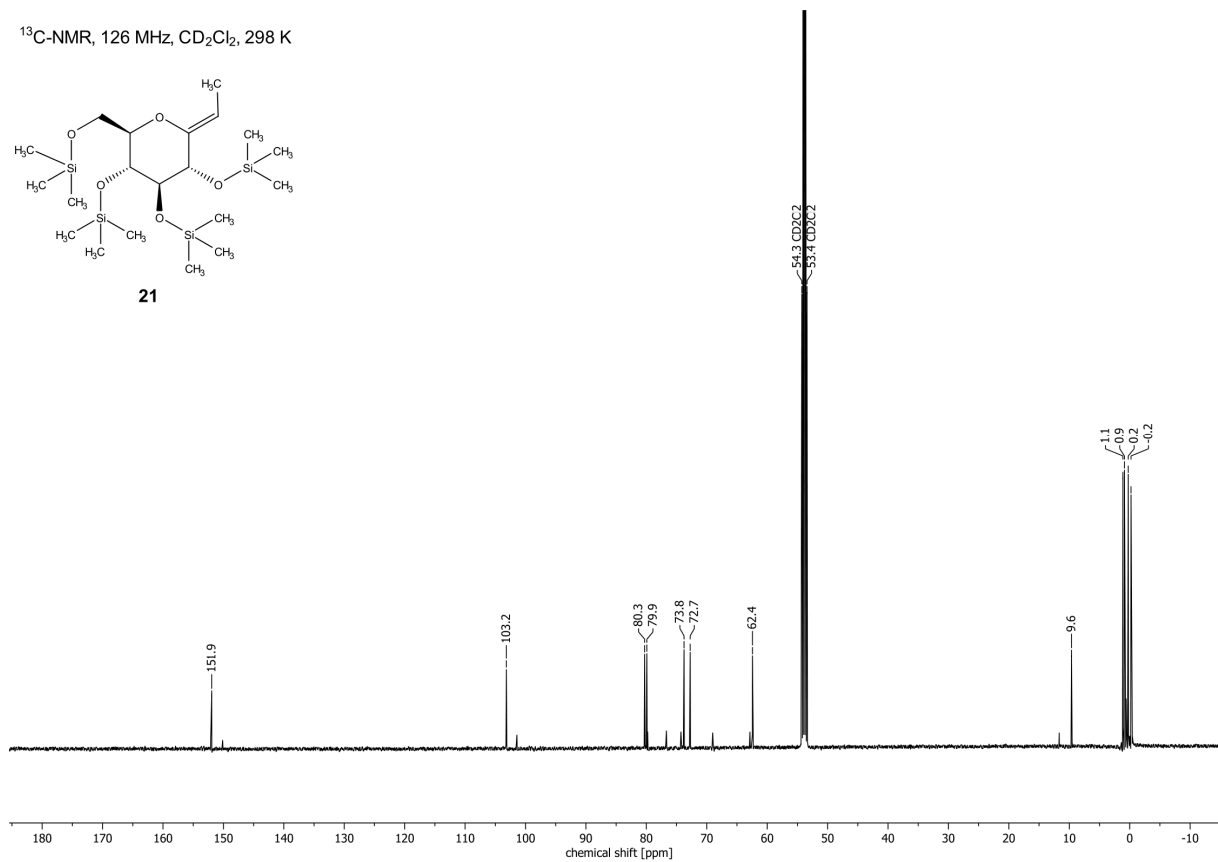

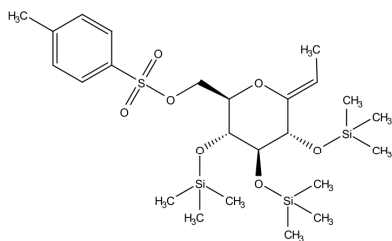

22

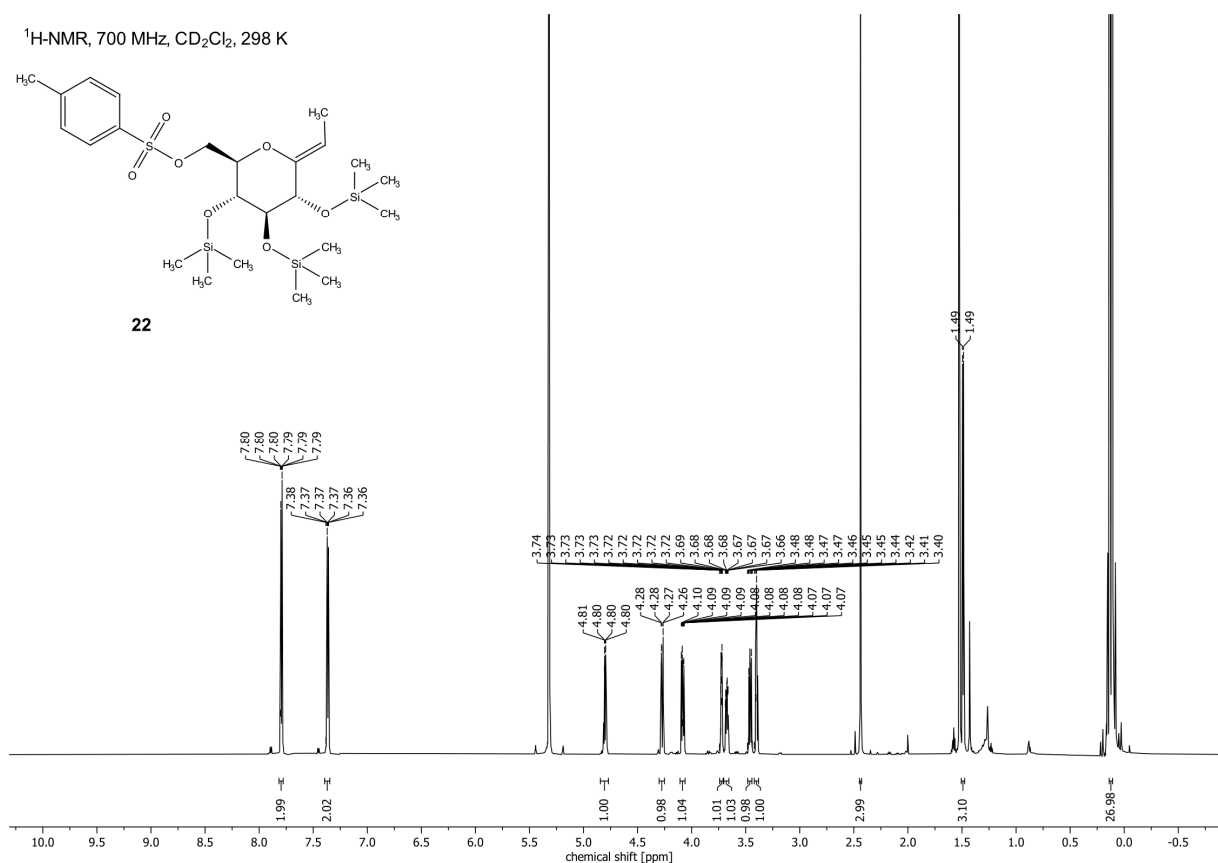 $^{13}\text{C}$ -NMR, 176 MHz,  $\text{CD}_2\text{Cl}_2$ , 298 K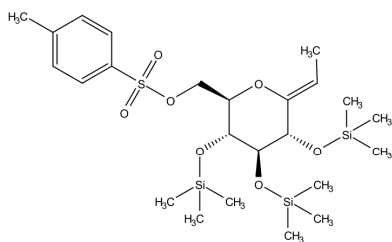

22

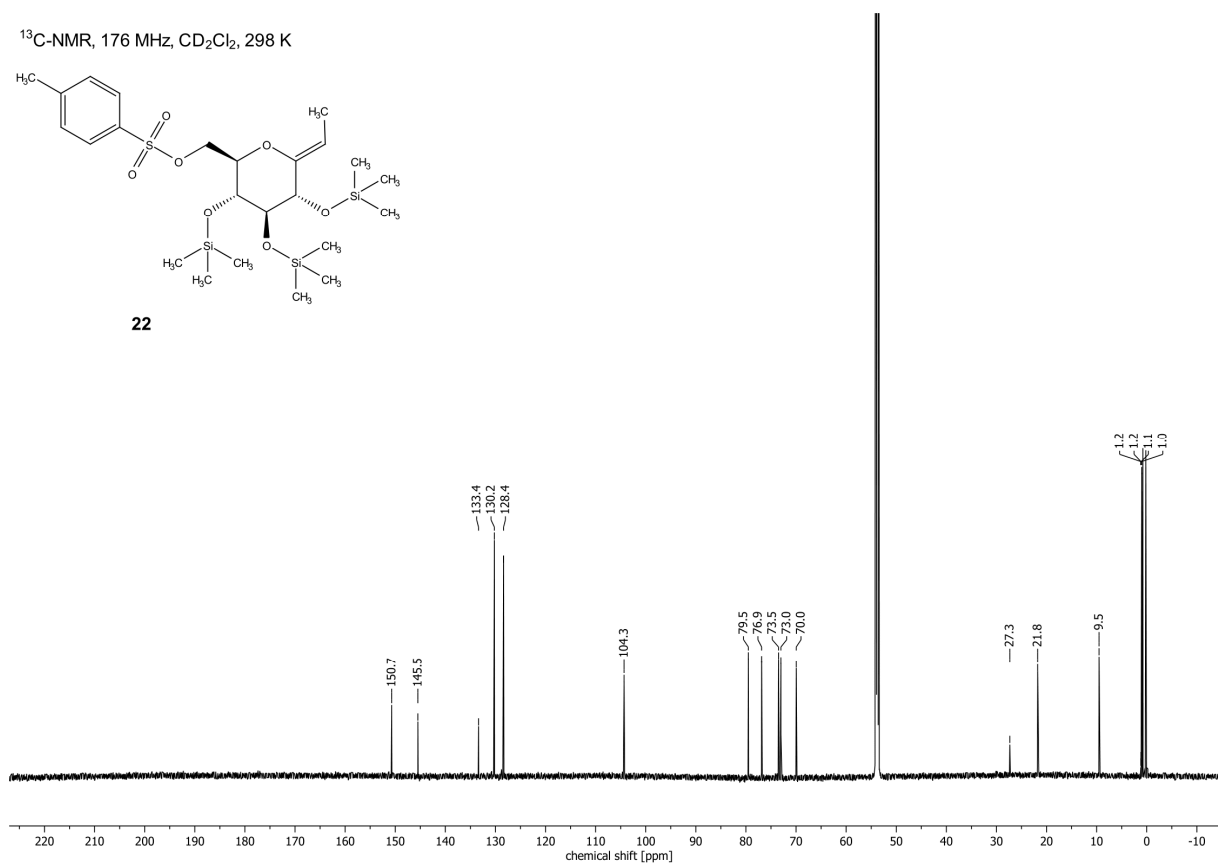

<sup>1</sup>H-NMR, 500 MHz, Acetone-d<sub>6</sub>, 298 K

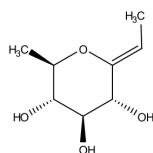

**23**

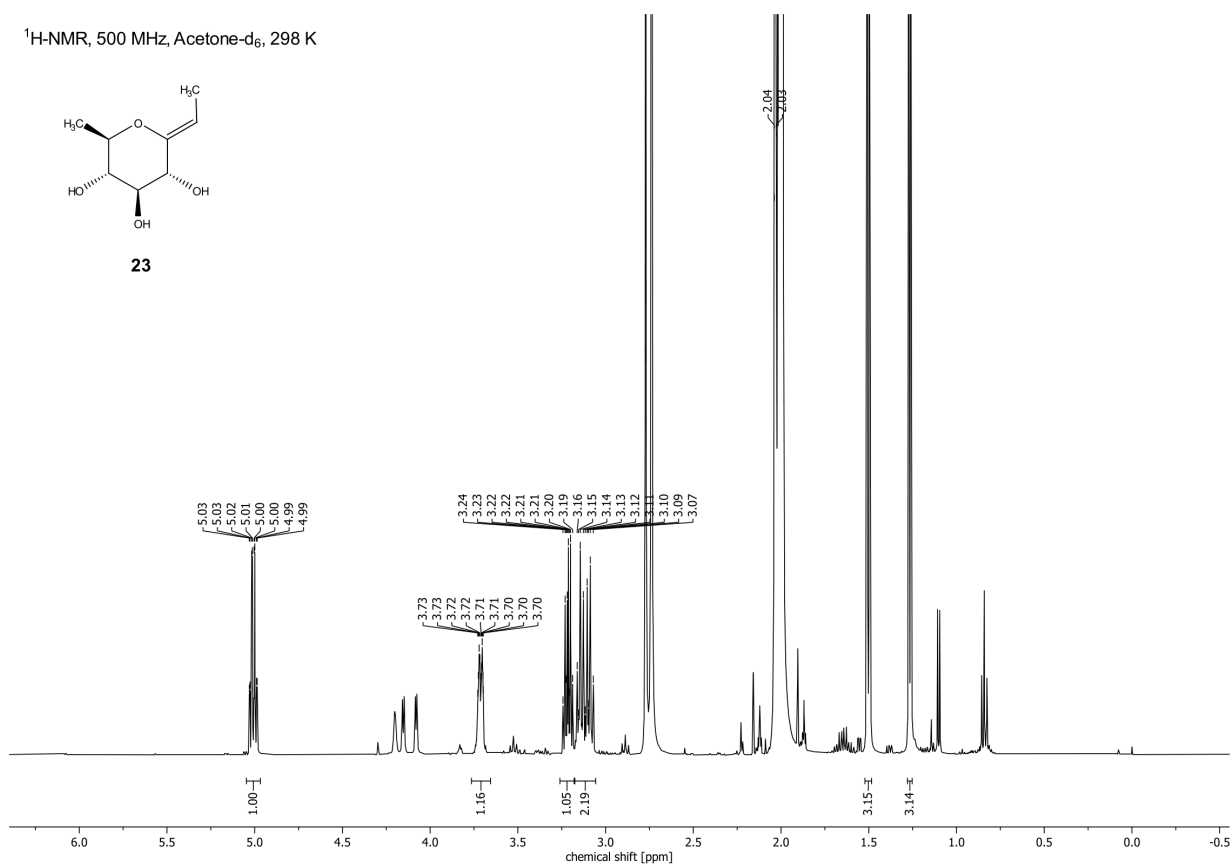

<sup>13</sup>C-NMR, 126 MHz, Acetone-d<sub>6</sub>, 298 K

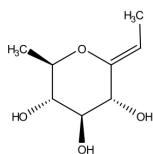

**23**

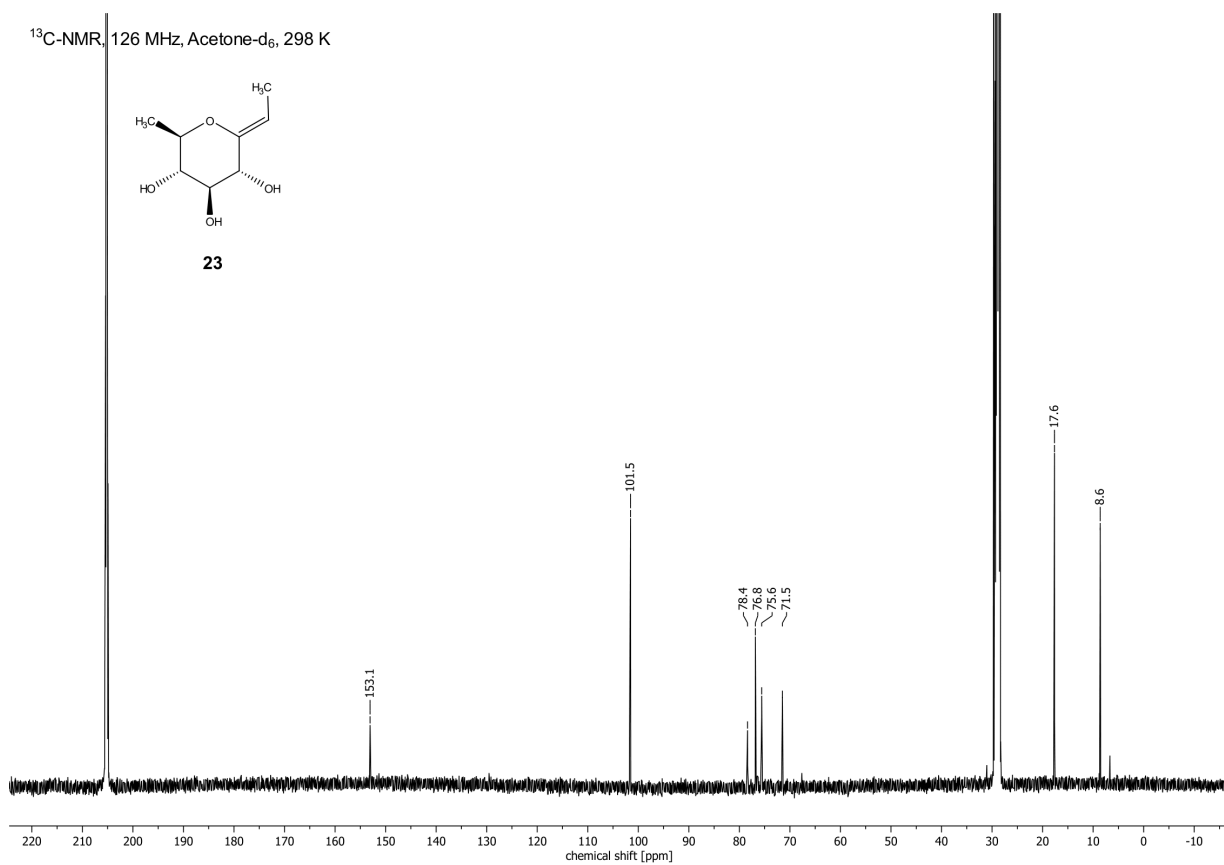

<sup>1</sup>H-NMR, 500 MHz, Acetone-d<sub>6</sub>, 298 K

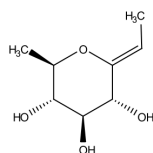

**24**

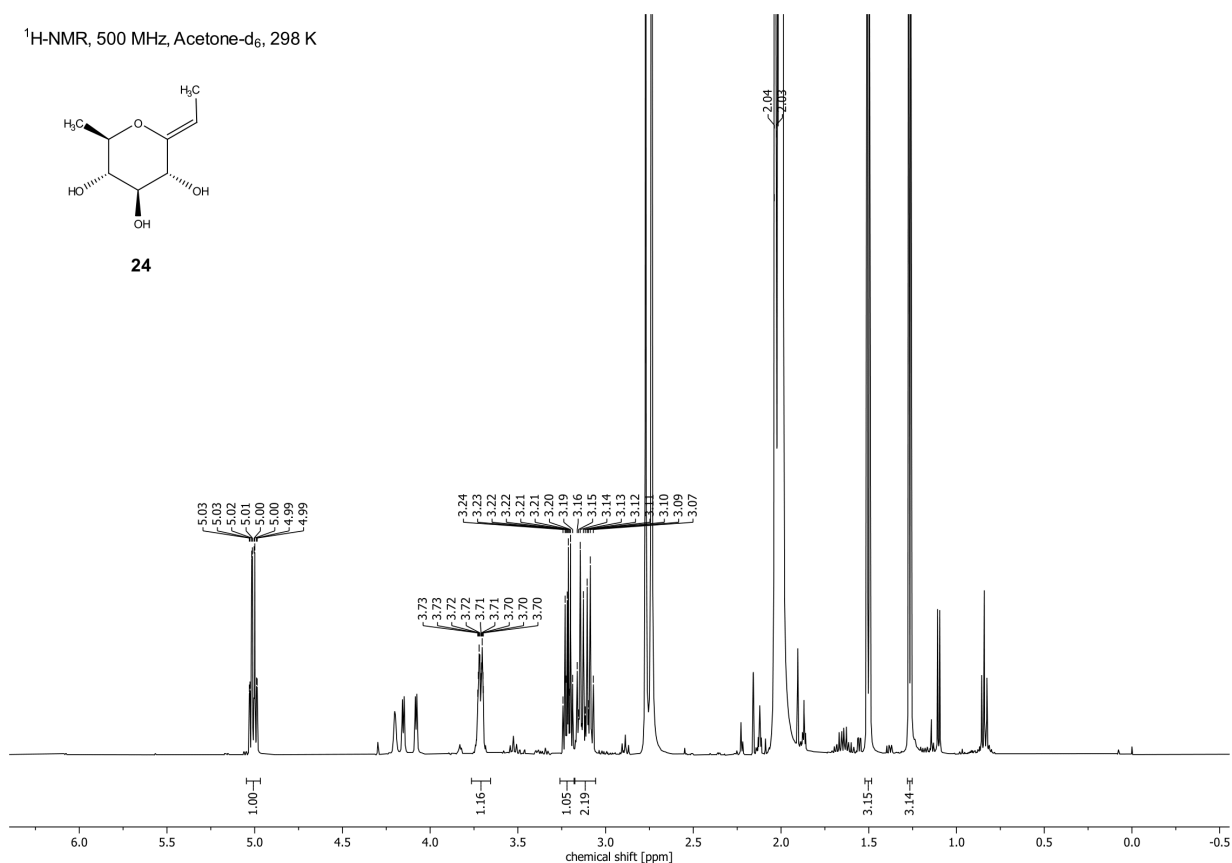

<sup>13</sup>C-NMR, 126 MHz, Acetone-d<sub>6</sub>, 298 K

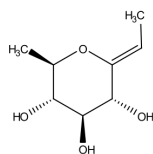

**24**

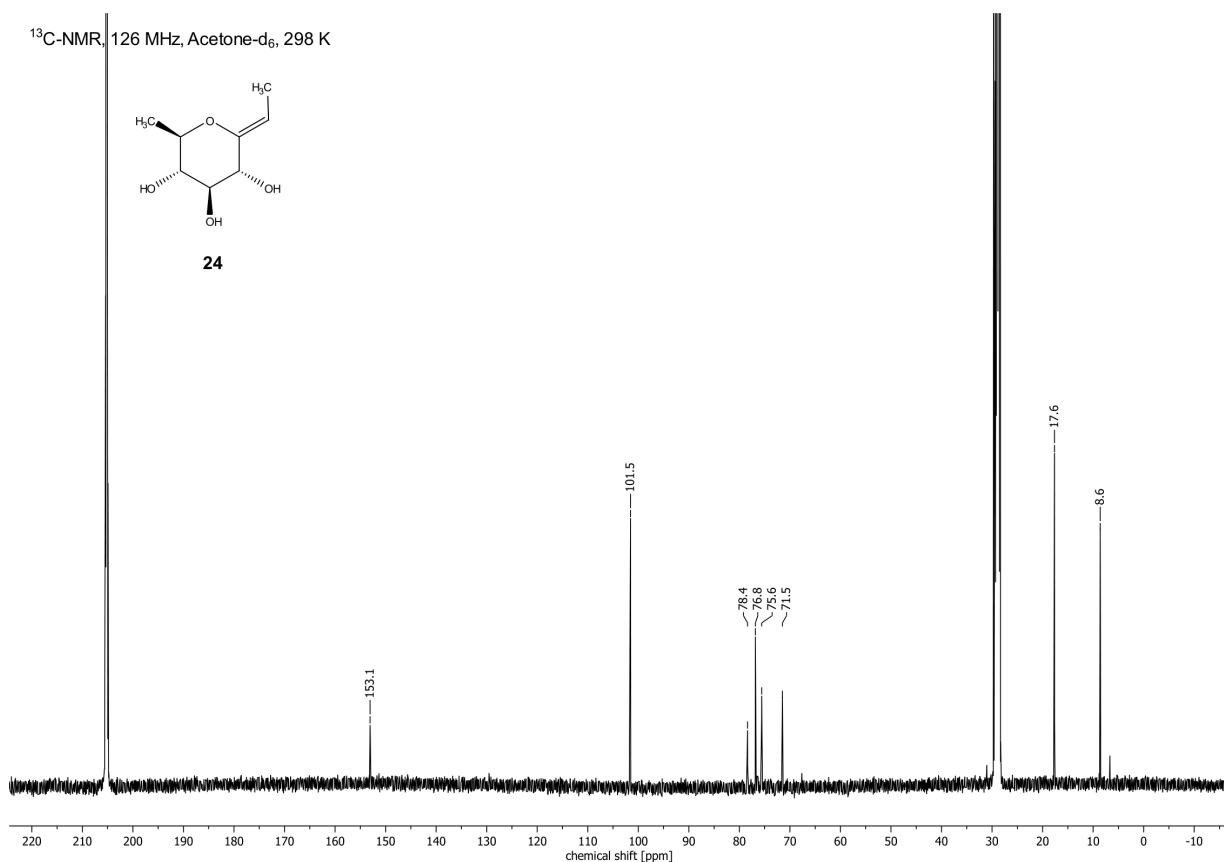

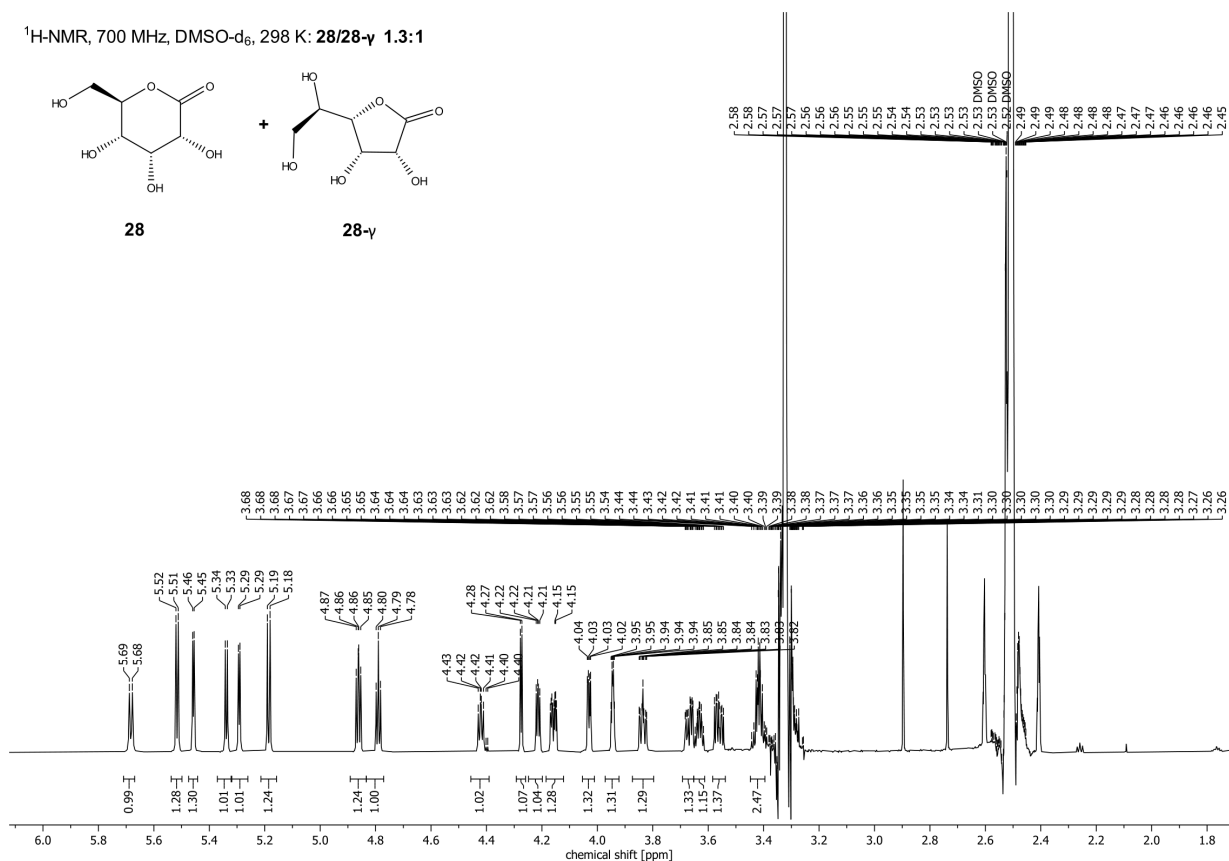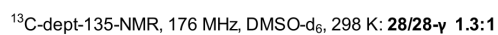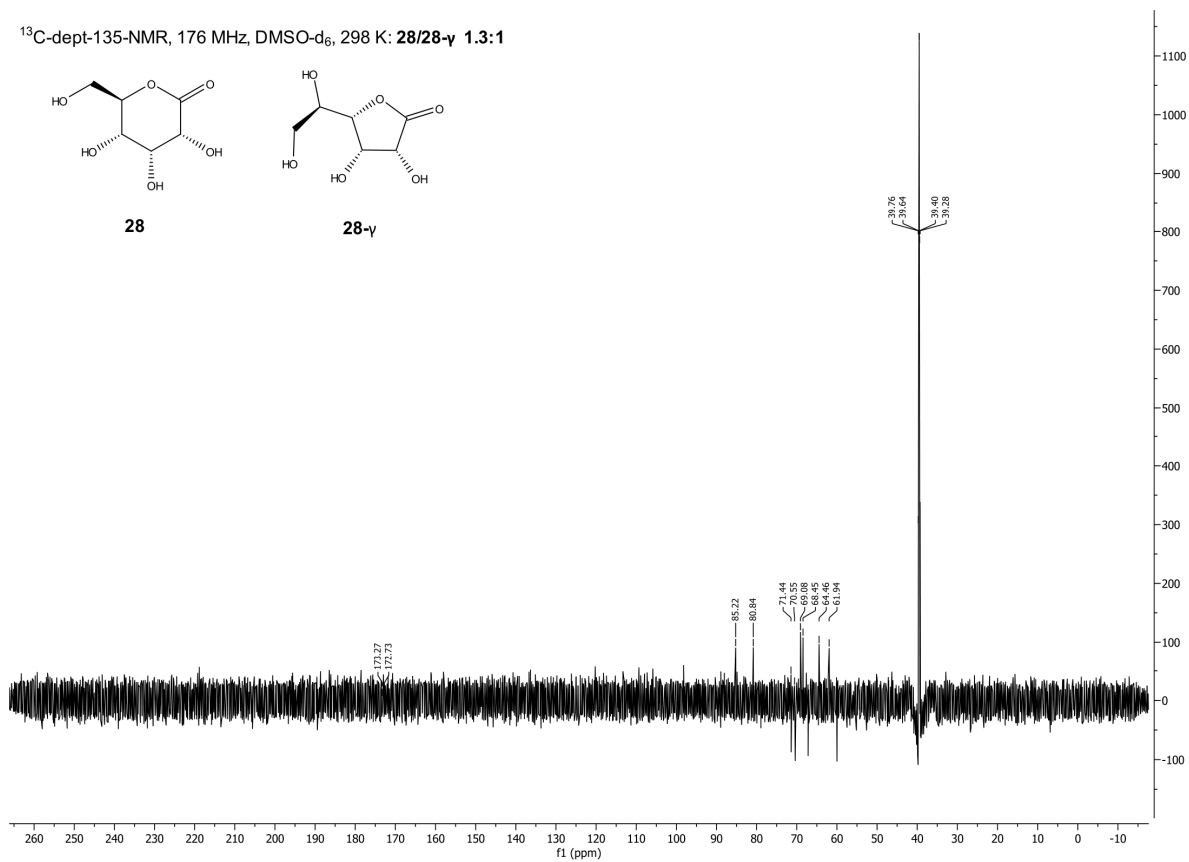

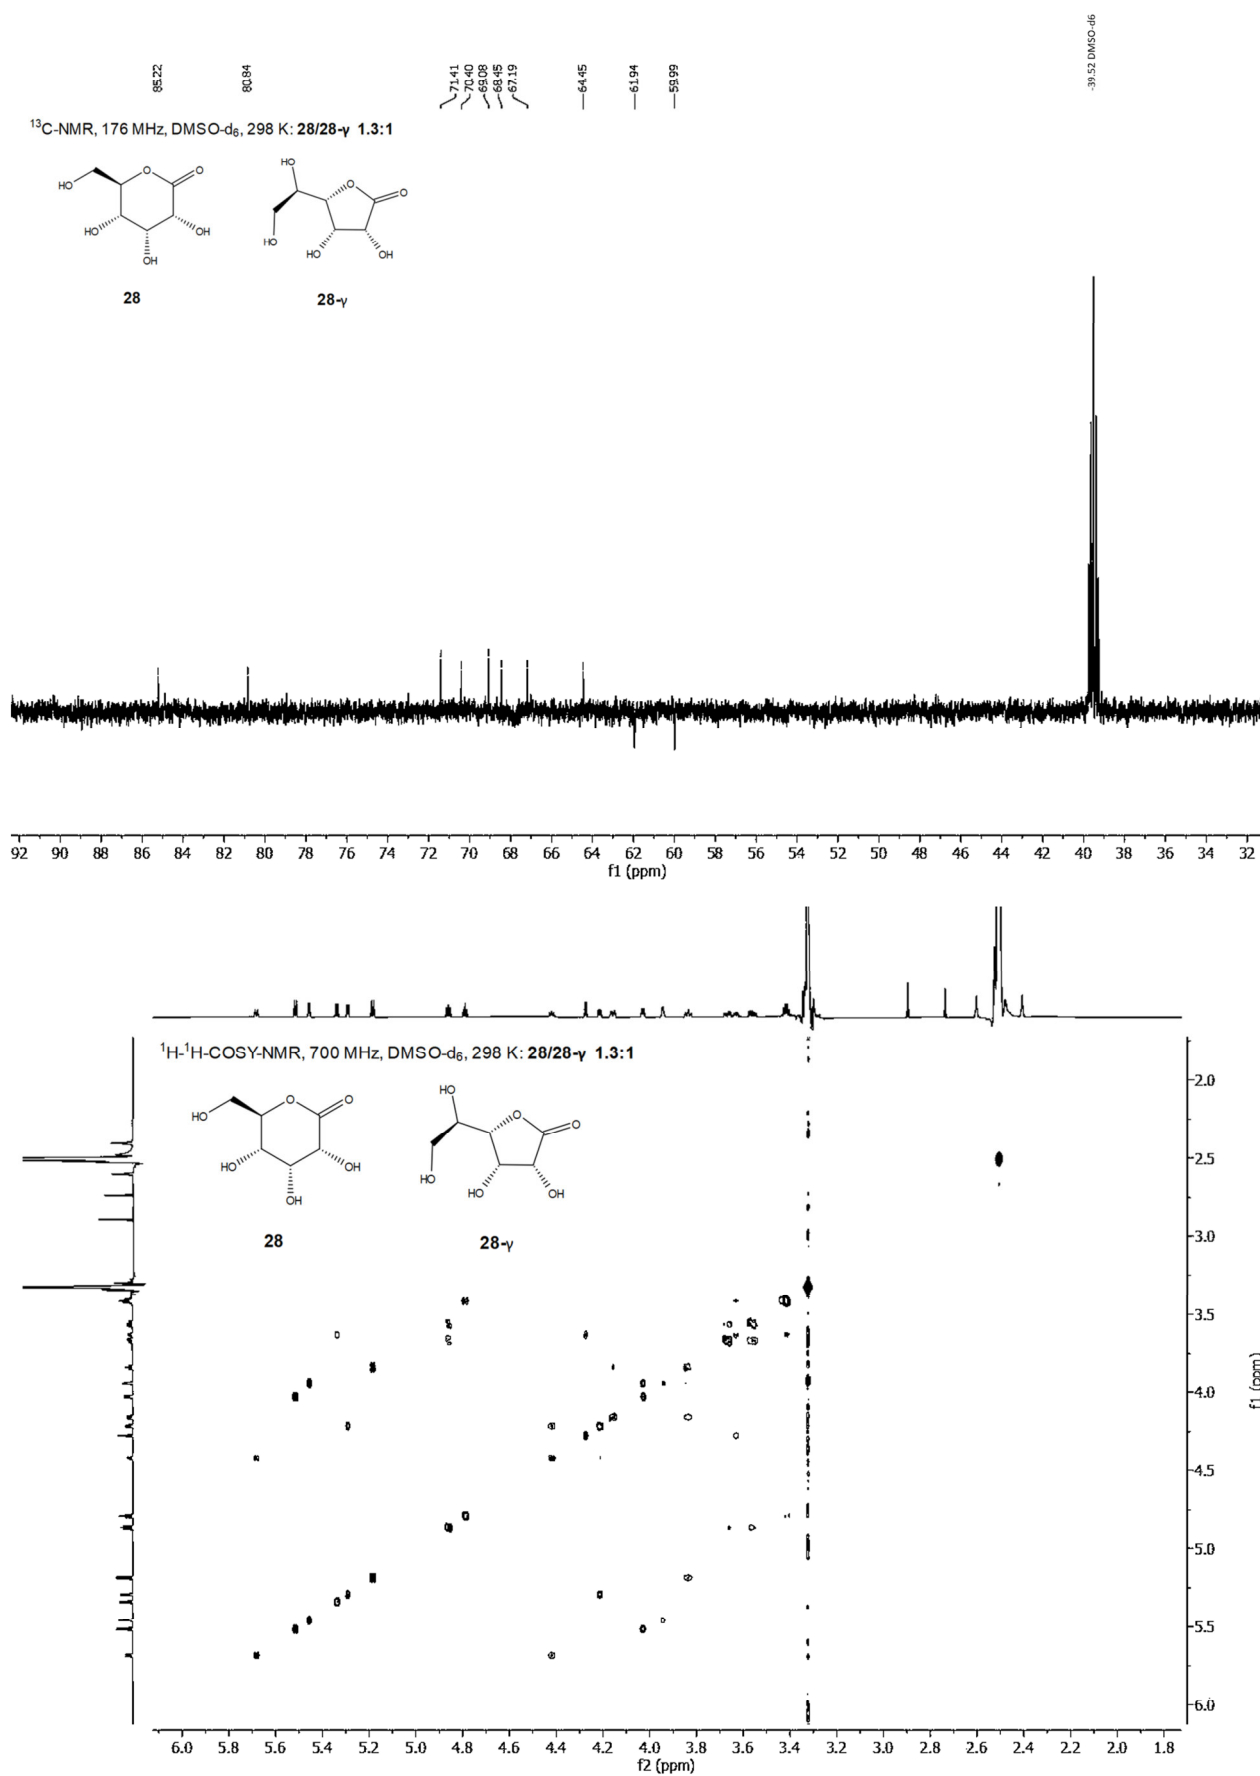

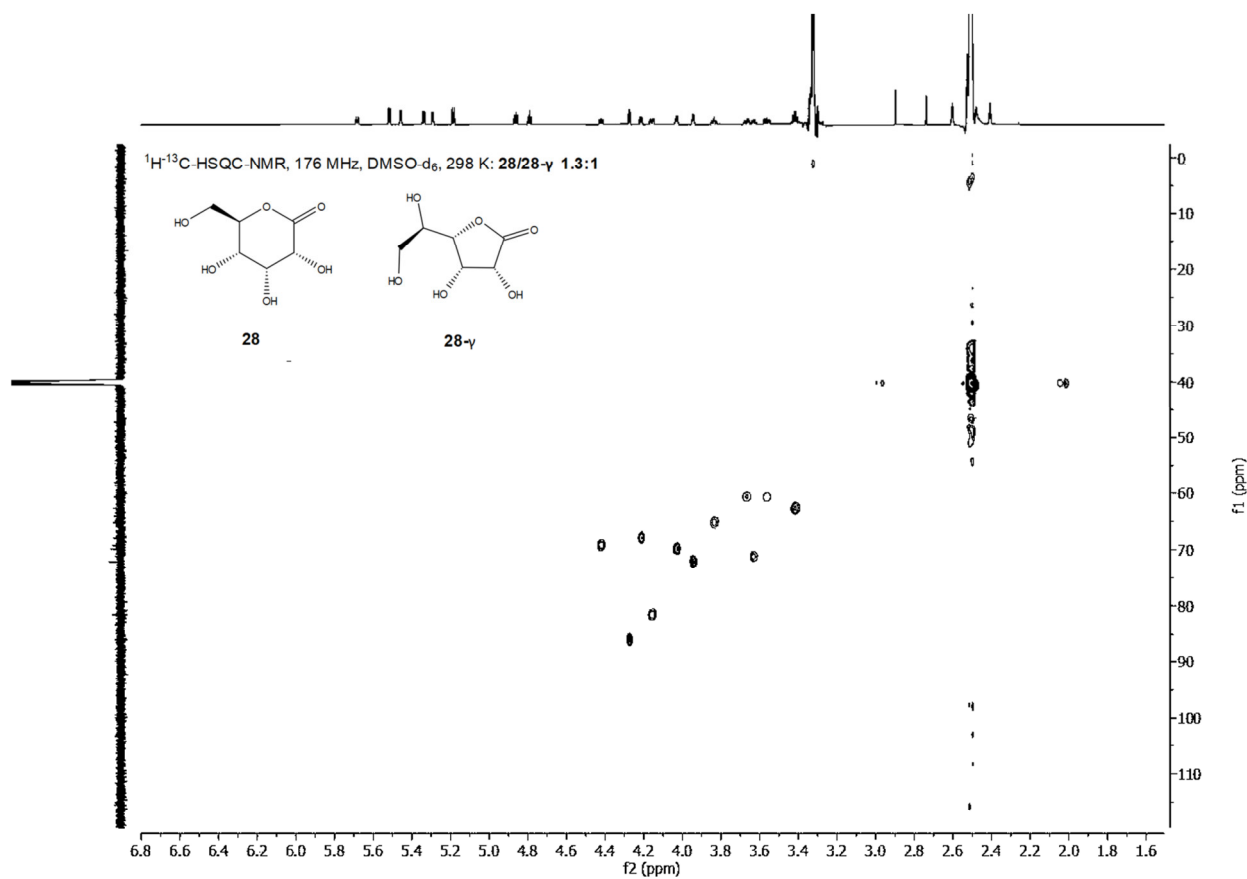



<sup>1</sup>H-NMR, 500 MHz, CD<sub>2</sub>Cl<sub>2</sub>, 298 K

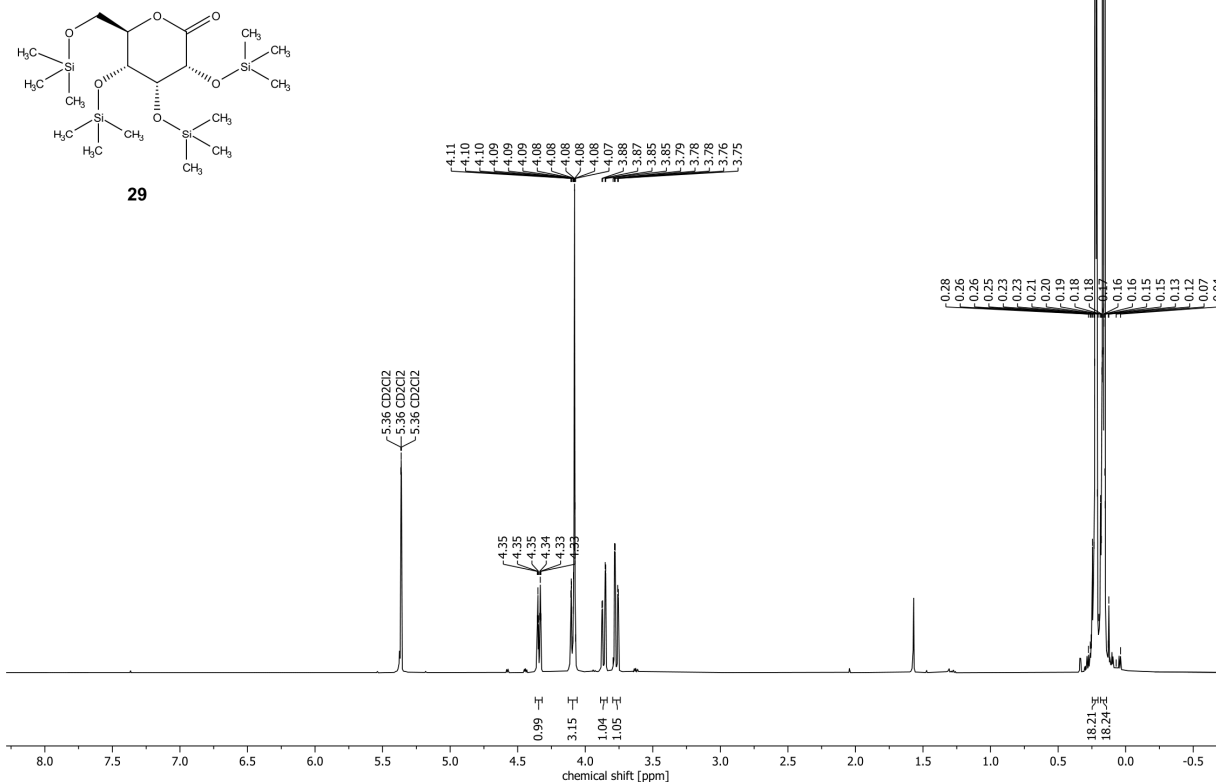

<sup>13</sup>C-NMR, 126 MHz, CD<sub>2</sub>Cl<sub>2</sub>, 298 K

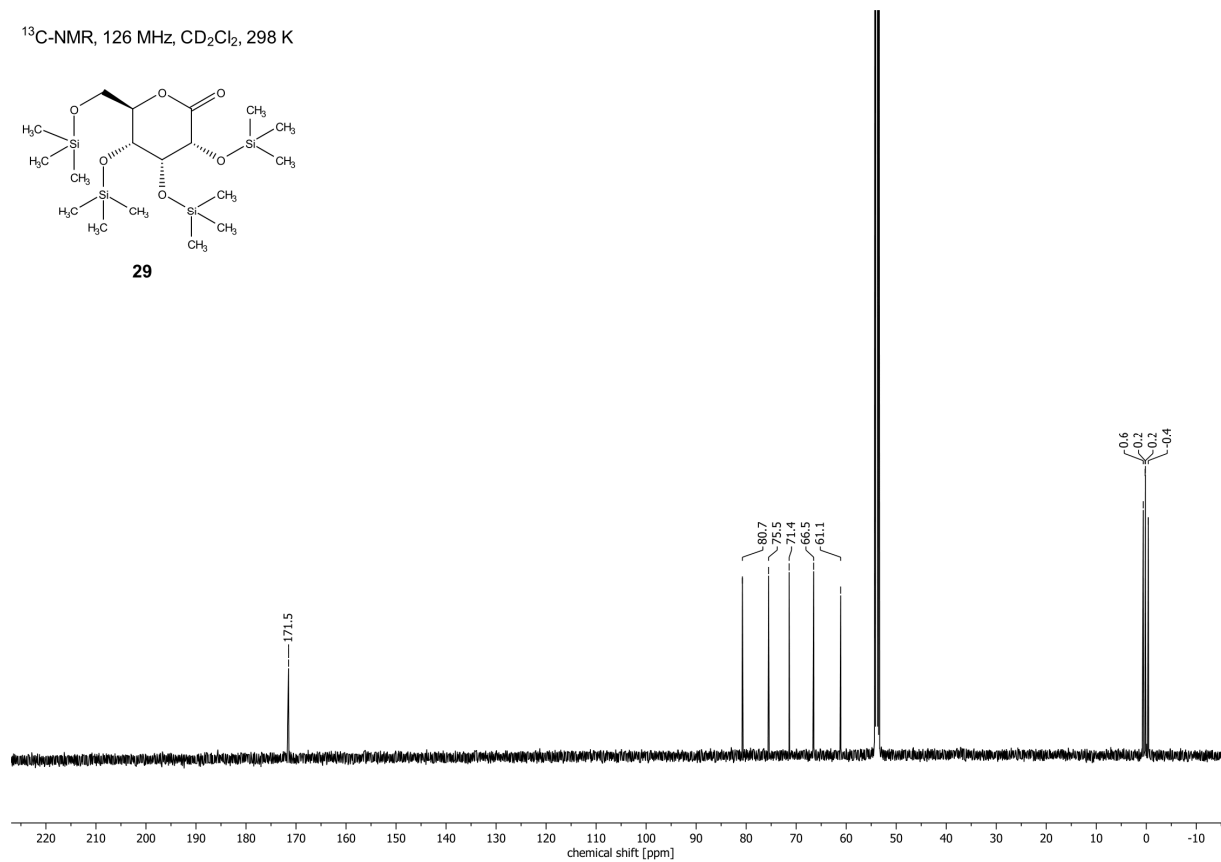

<sup>1</sup>H-NMR, 700 MHz, CD<sub>2</sub>Cl<sub>2</sub>, 298 K

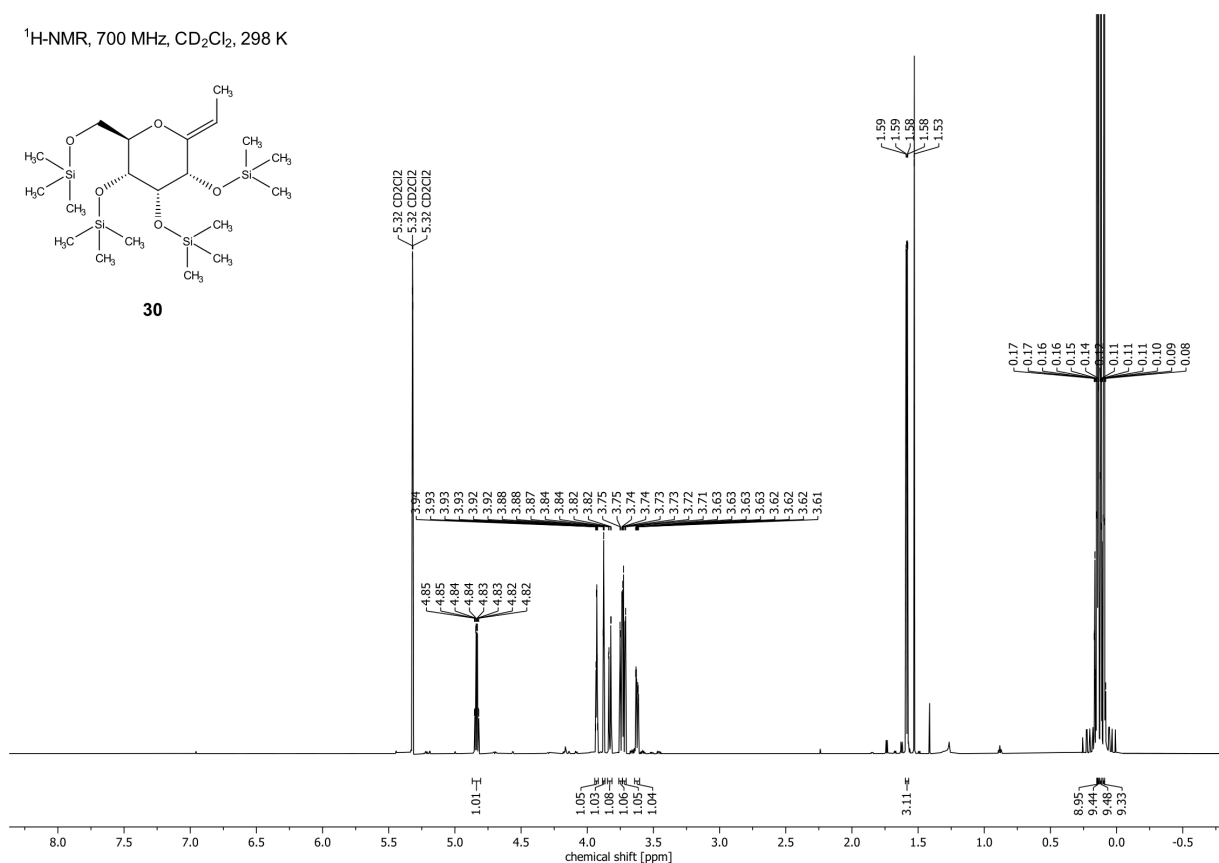

<sup>13</sup>C-NMR, 126 MHz, CD<sub>2</sub>Cl<sub>2</sub>, 298 K

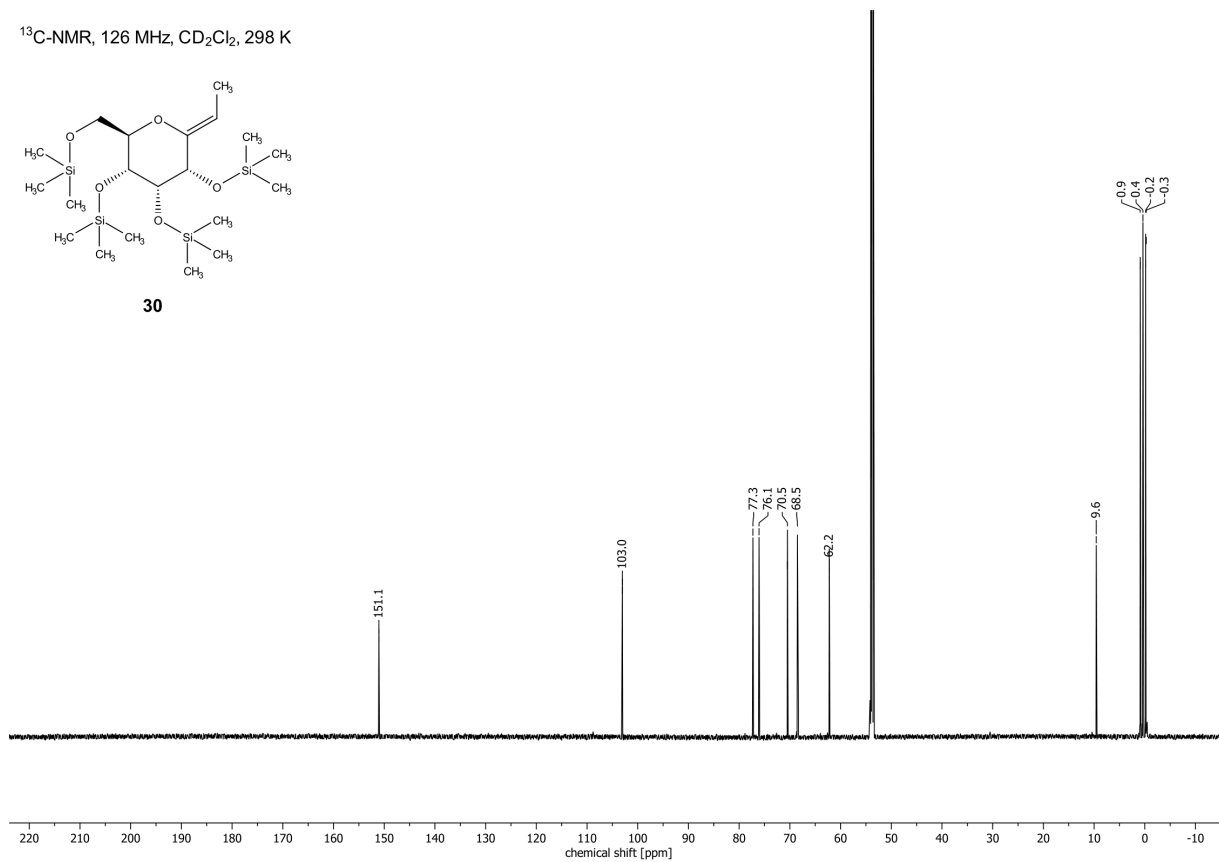

<sup>1</sup>H-NMR, 500 MHz, CD<sub>2</sub>Cl<sub>2</sub>, 298 K

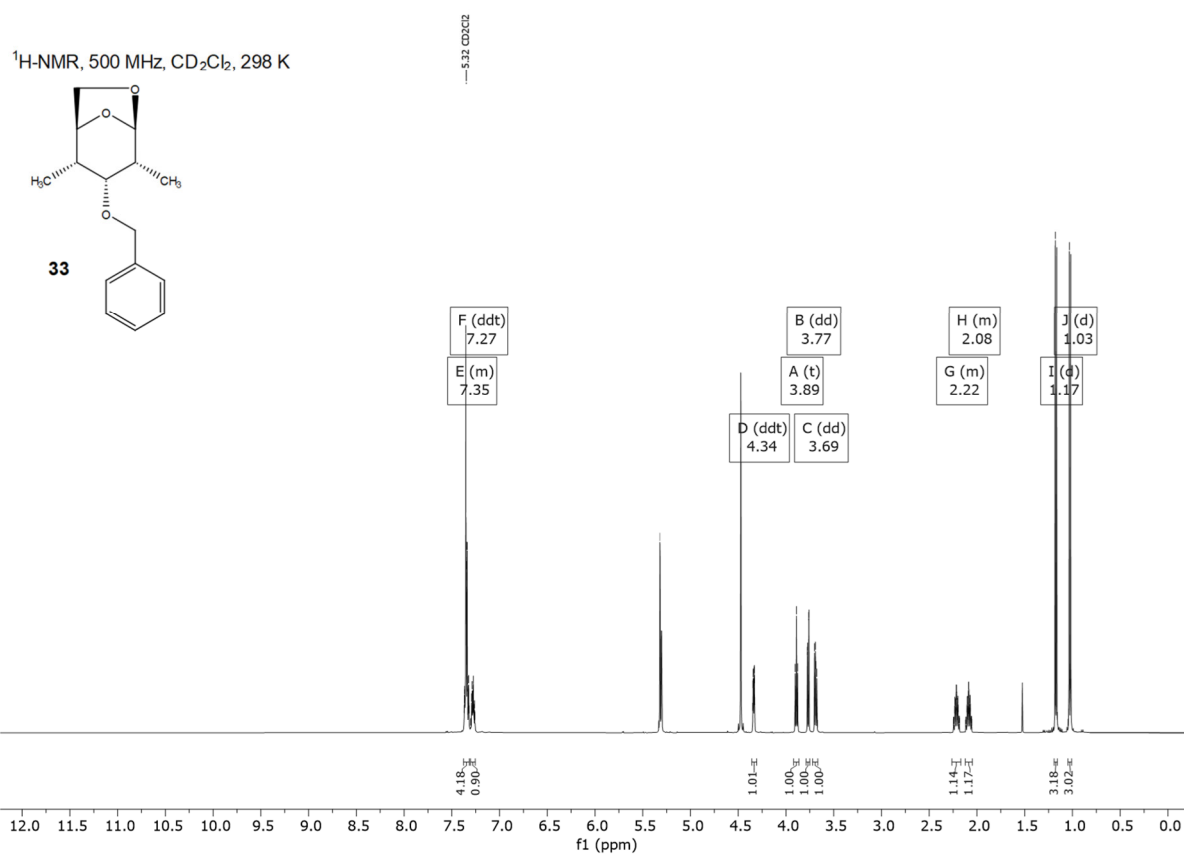

<sup>13</sup>C-NMR, 126 MHz, CD<sub>2</sub>Cl<sub>2</sub>, 298 K

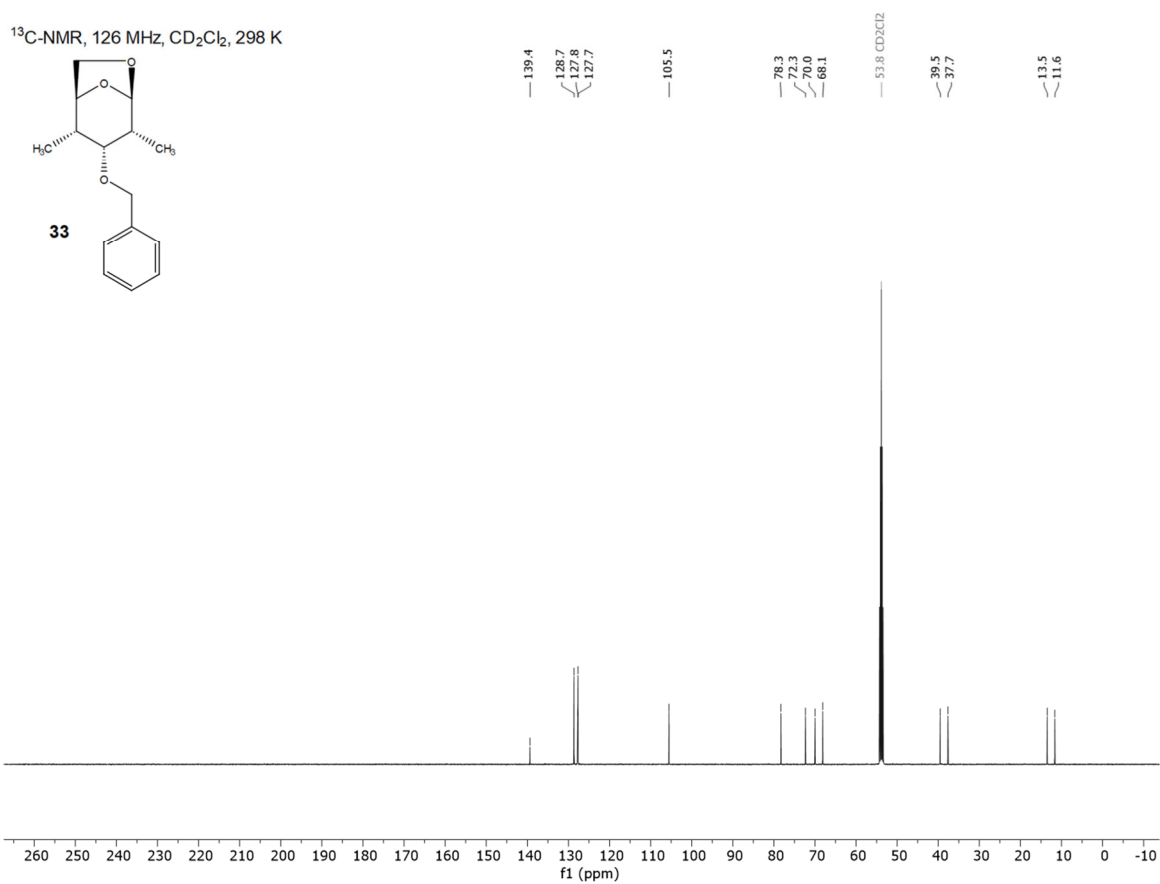

<sup>1</sup>H-NMR, 400 MHz, CD<sub>2</sub>Cl<sub>2</sub>, 298 K

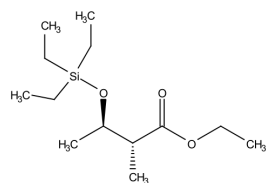

**S1**

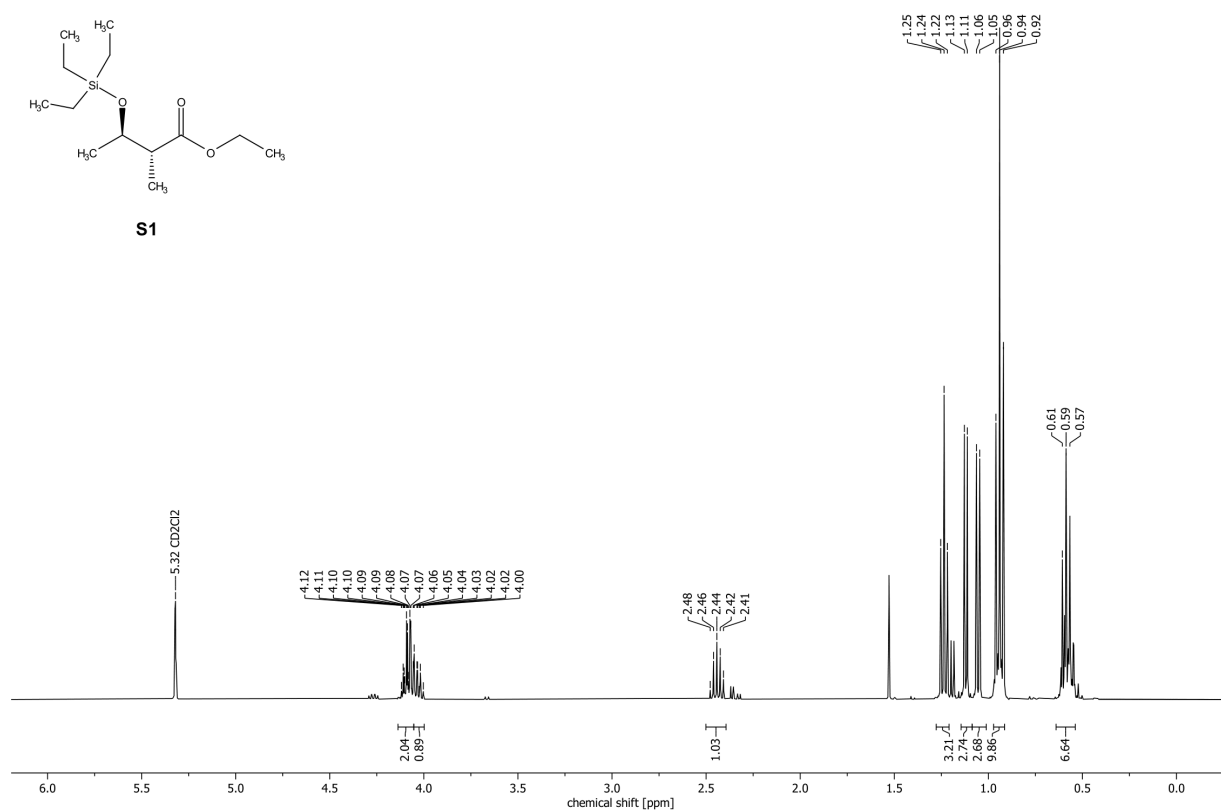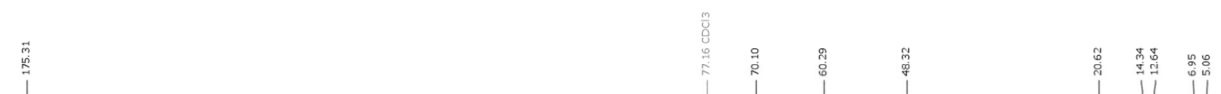

<sup>13</sup>C-NMR, 126 MHz, CDCl<sub>3</sub>, 298 K

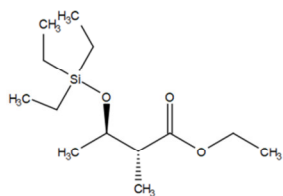

**S1**

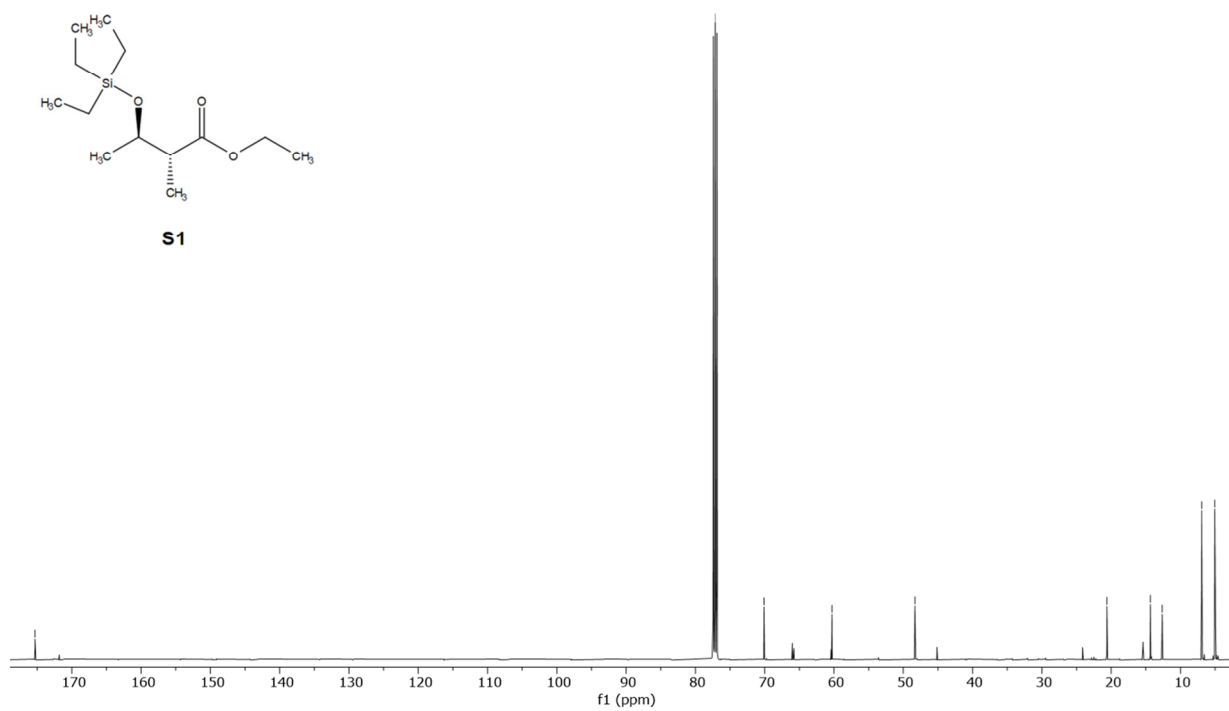

<sup>1</sup>H-NMR, 700 MHz, CDCl<sub>3</sub>, 298 K

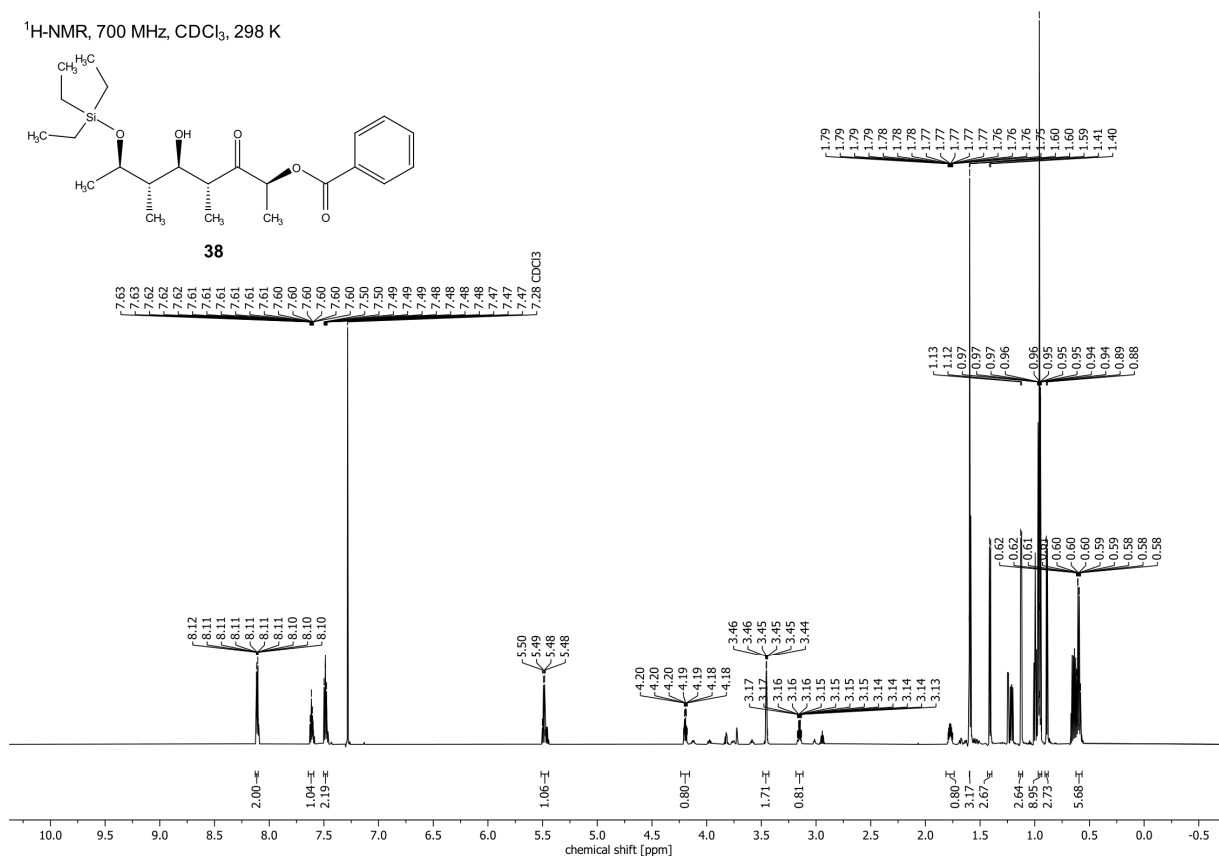

<sup>13</sup>C-NMR, 176 MHz, CDCl<sub>3</sub>, 298 K

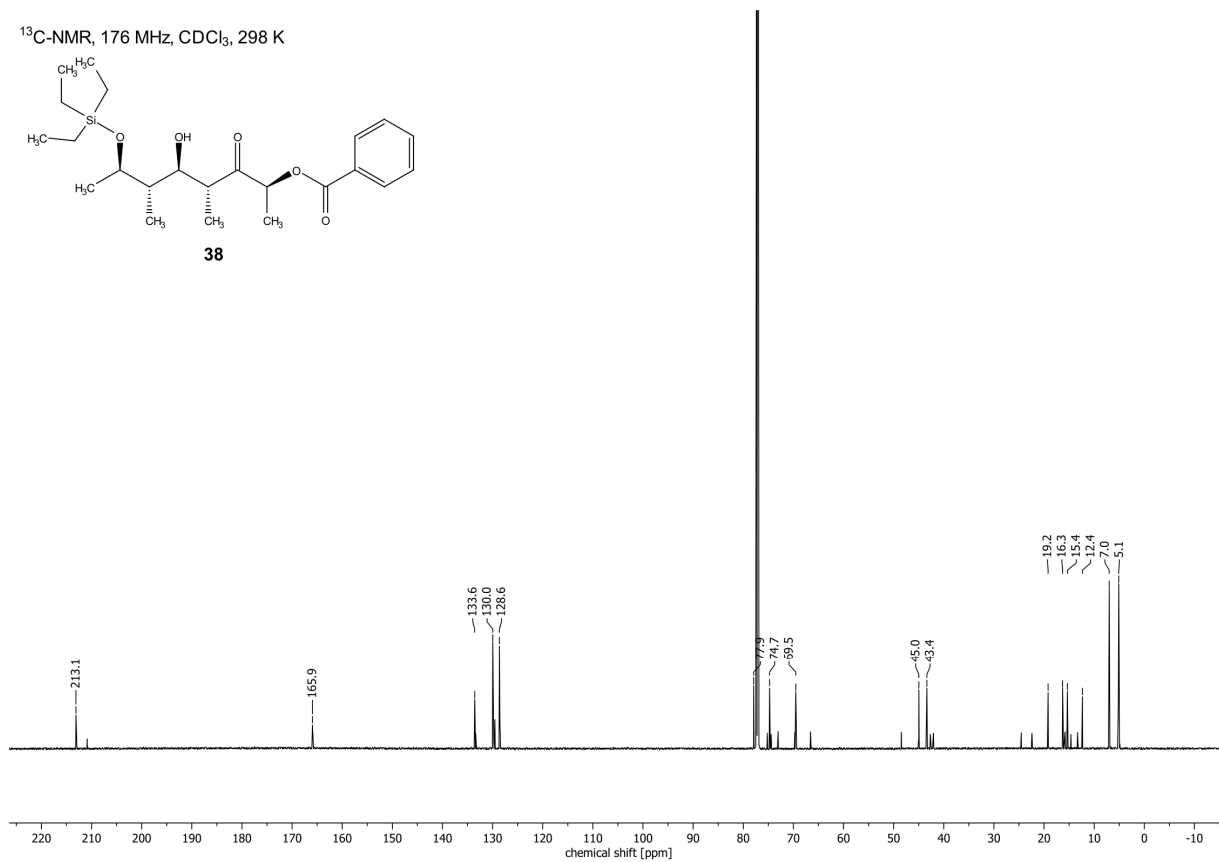

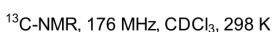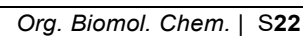

$^1\text{H-NMR}$ , 700 MHz,  $\text{CD}_2\text{Cl}_2$ , 298 K

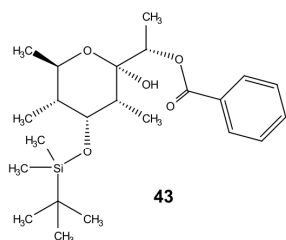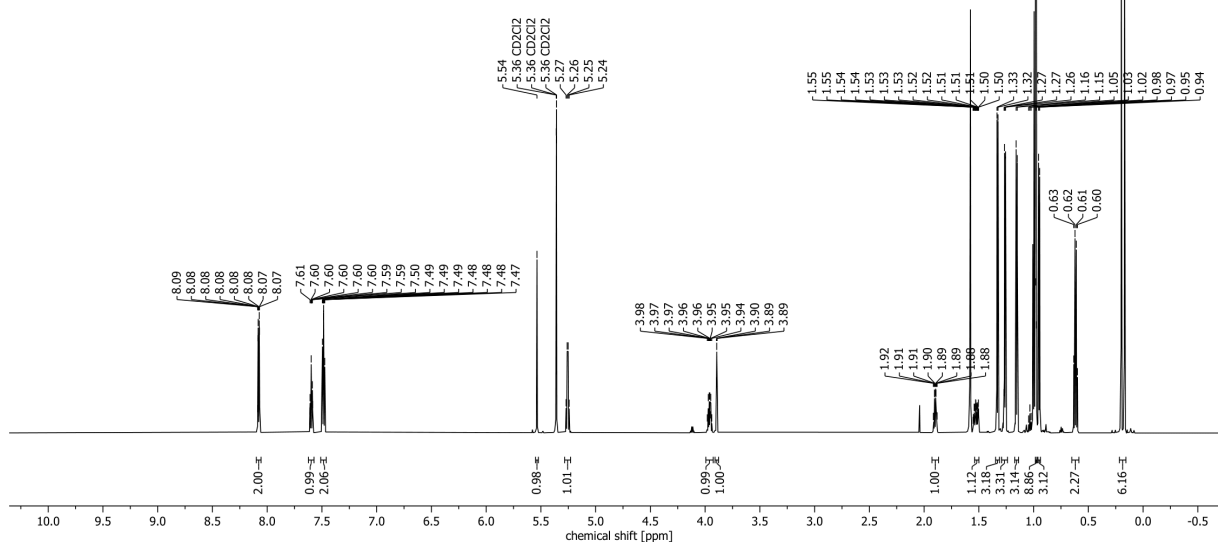

$^{13}\text{C-NMR}$ , 176 MHz,  $\text{CD}_2\text{Cl}_2$ , 298 K

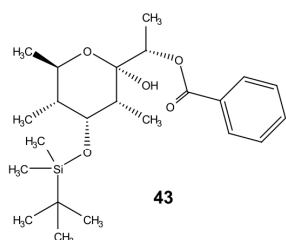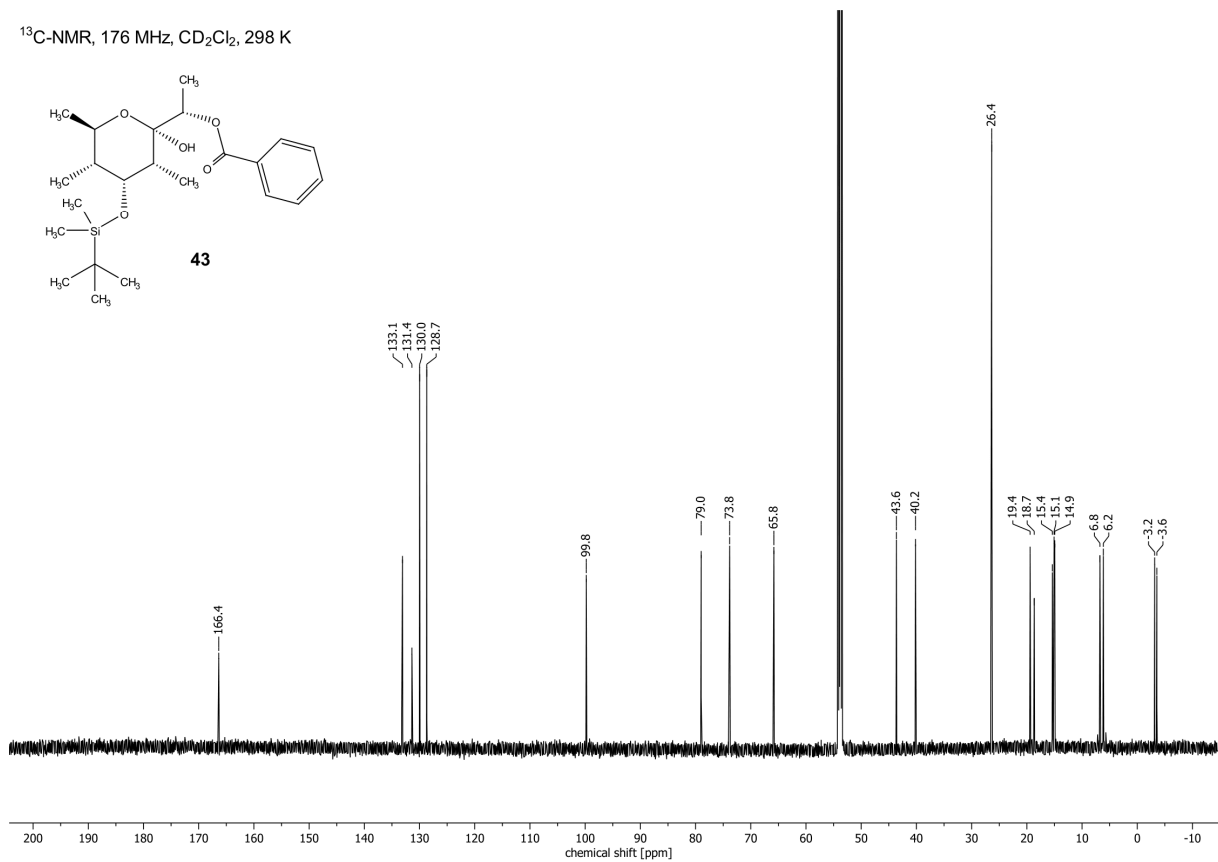





<sup>1</sup>H-NMR, 700 MHz, CD<sub>2</sub>Cl<sub>2</sub>, 298 K

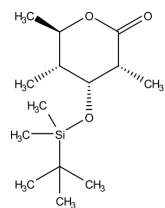

**45**

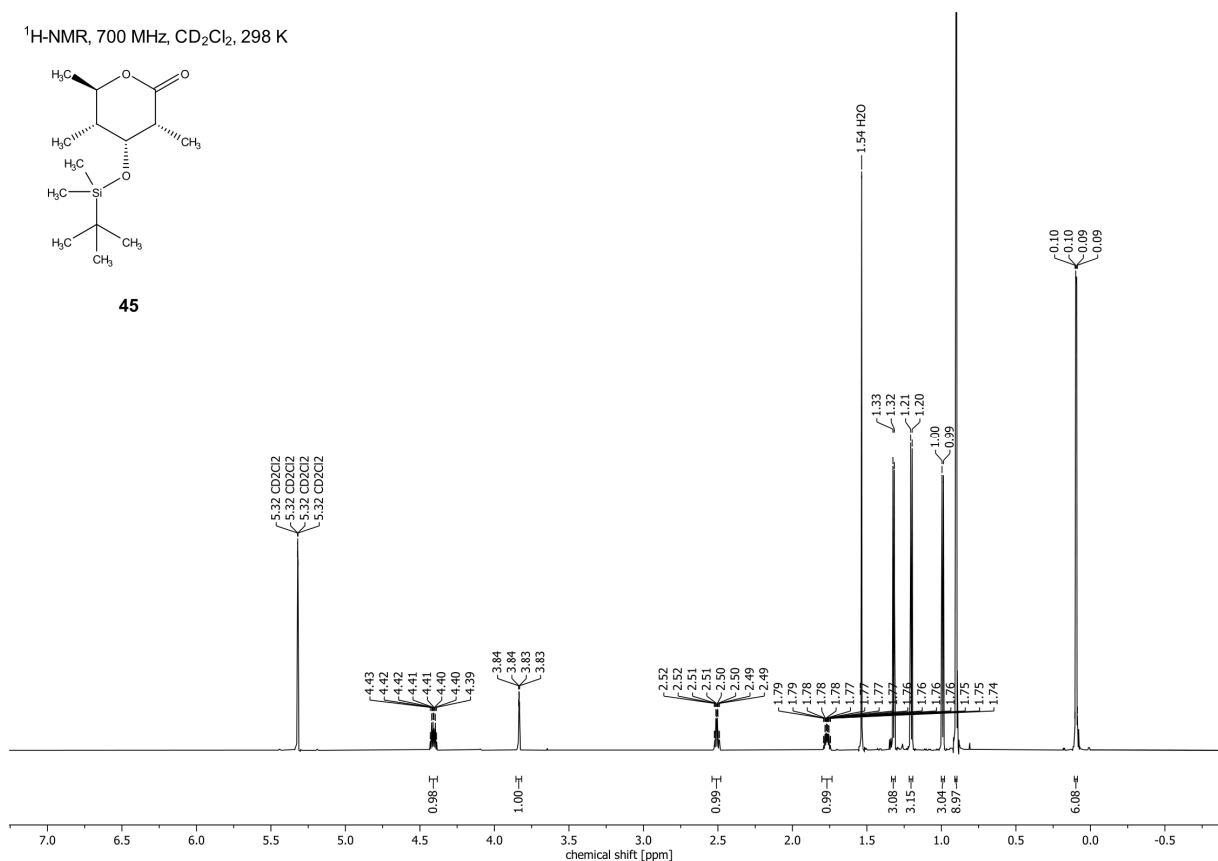

<sup>13</sup>C-NMR, 176 MHz, CD<sub>2</sub>Cl<sub>2</sub>, 298 K

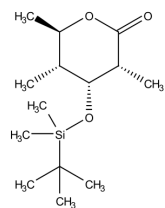

**45**

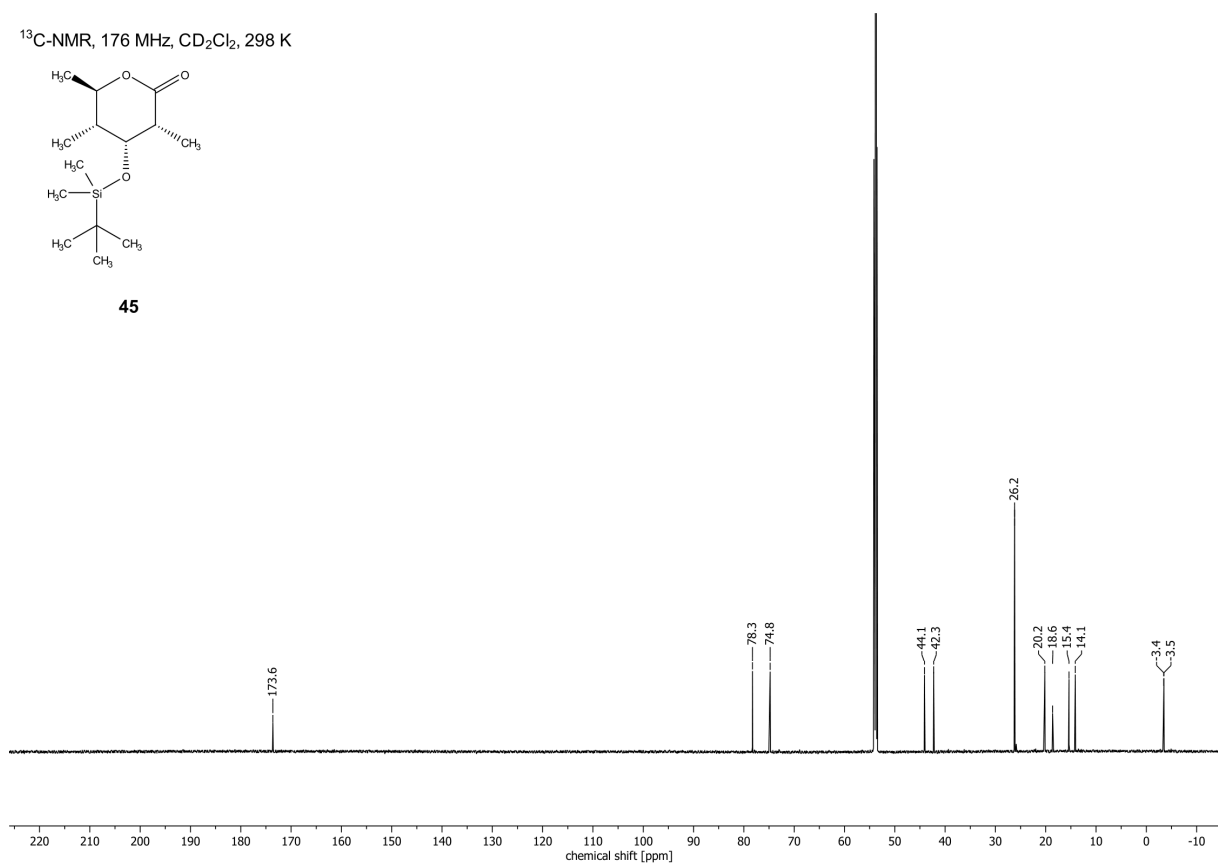

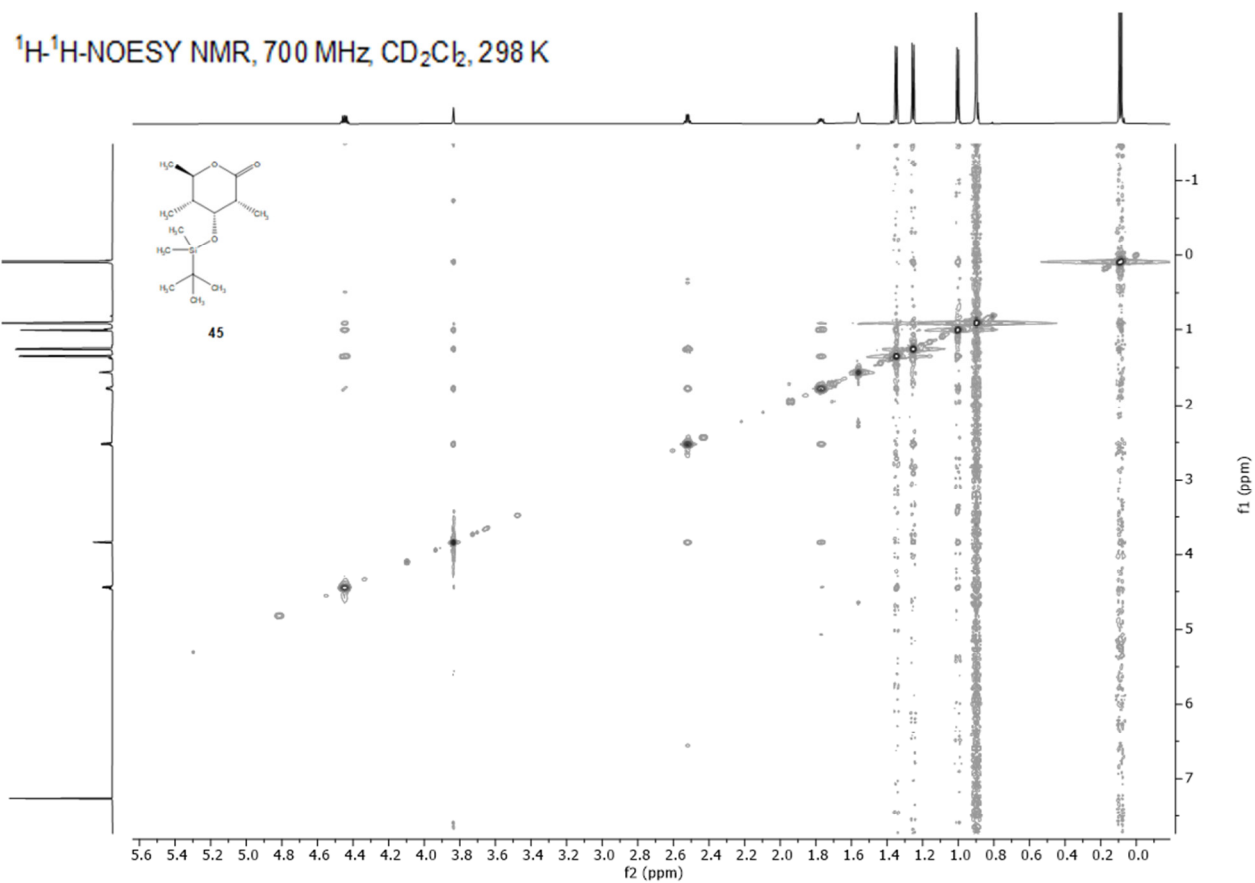

$^1\text{H-NMR}$ , 700 MHz,  $\text{CD}_2\text{Cl}_2$ , 298 K

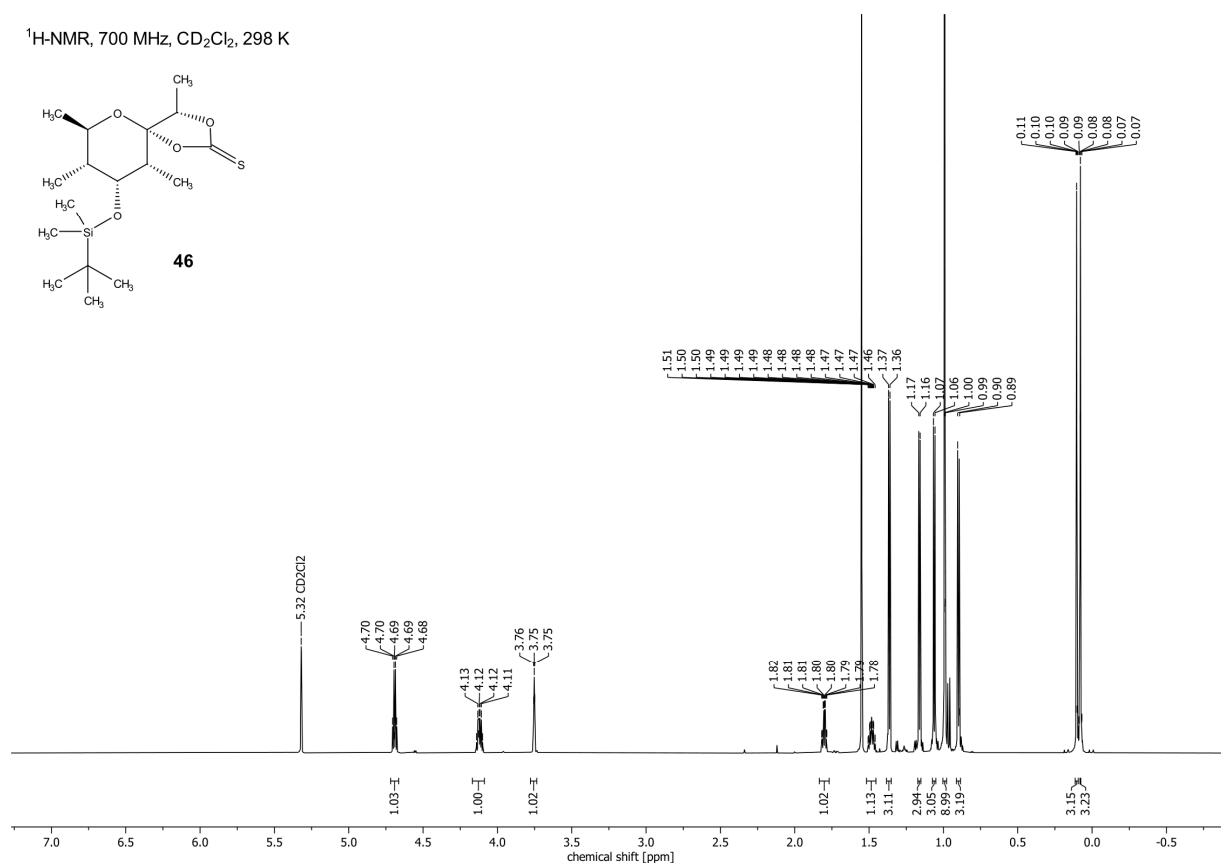

$^{13}\text{C-NMR}$ , 176 MHz,  $\text{CD}_2\text{Cl}_2$ , 298 K

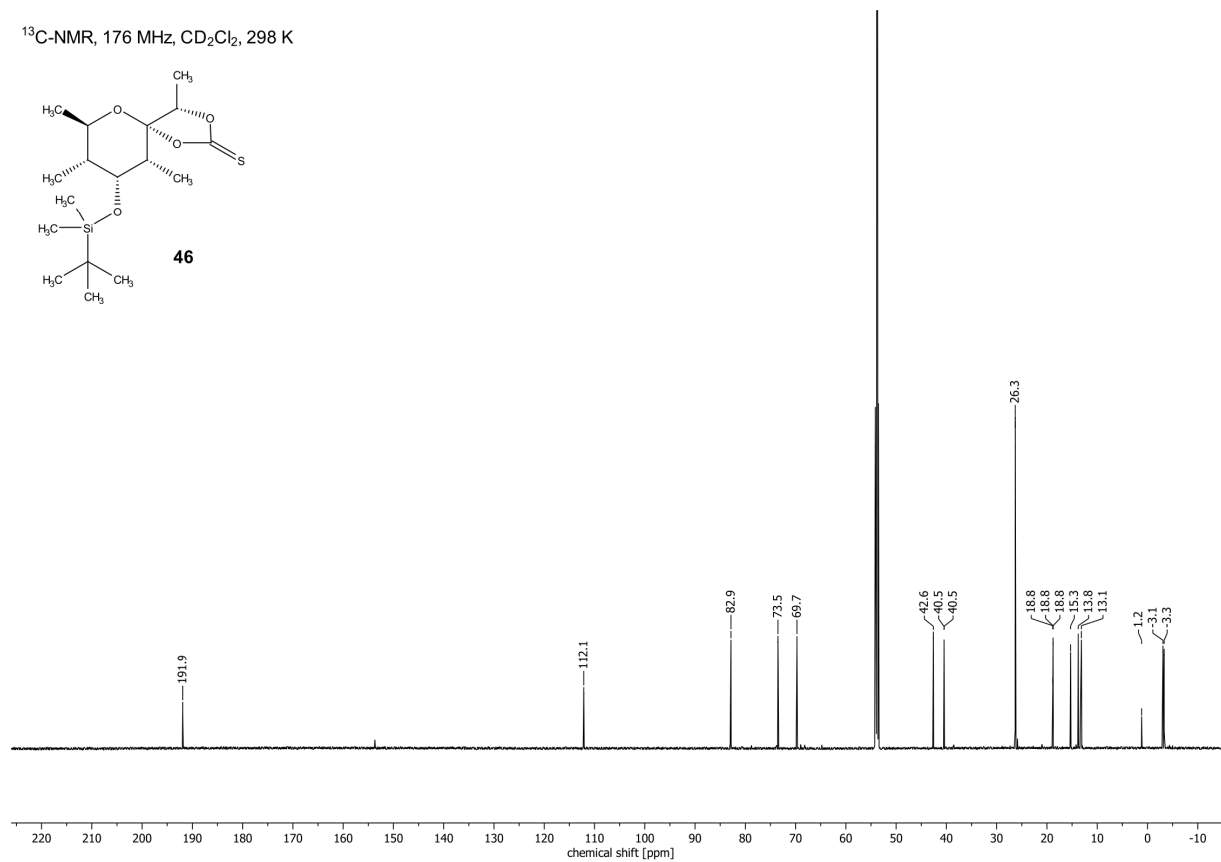

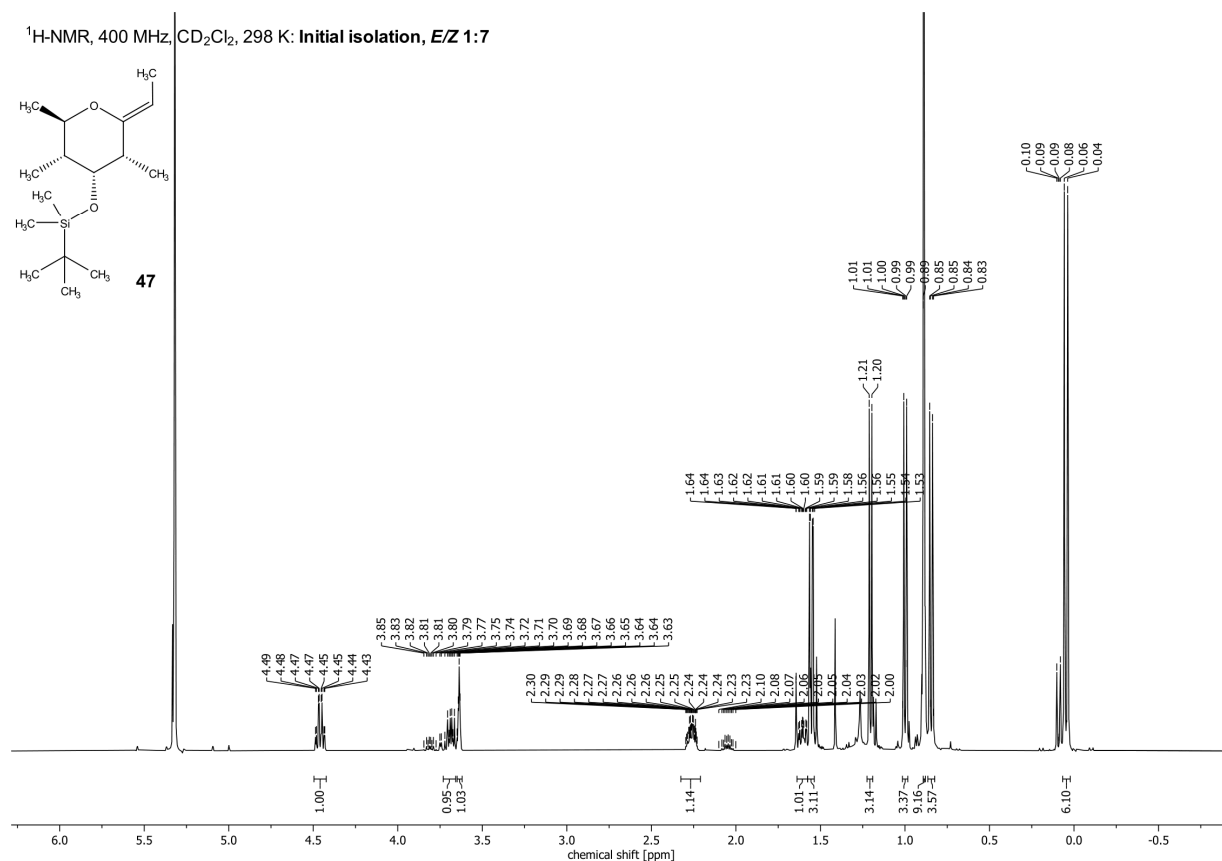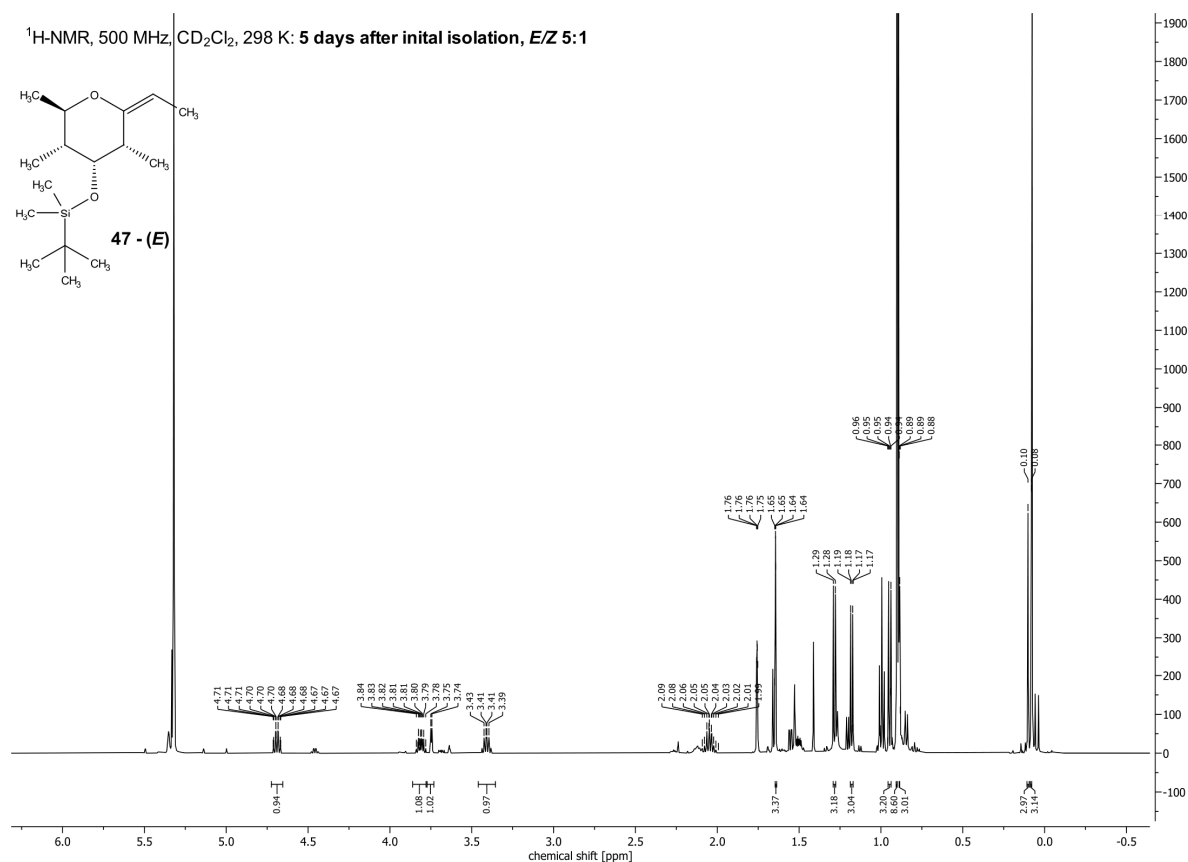

$^1\text{H-NMR}$ , 700 MHz,  $\text{CD}_2\text{Cl}_2$ , 298 K: 2 days after initial isolation, *E/Z* 1:2

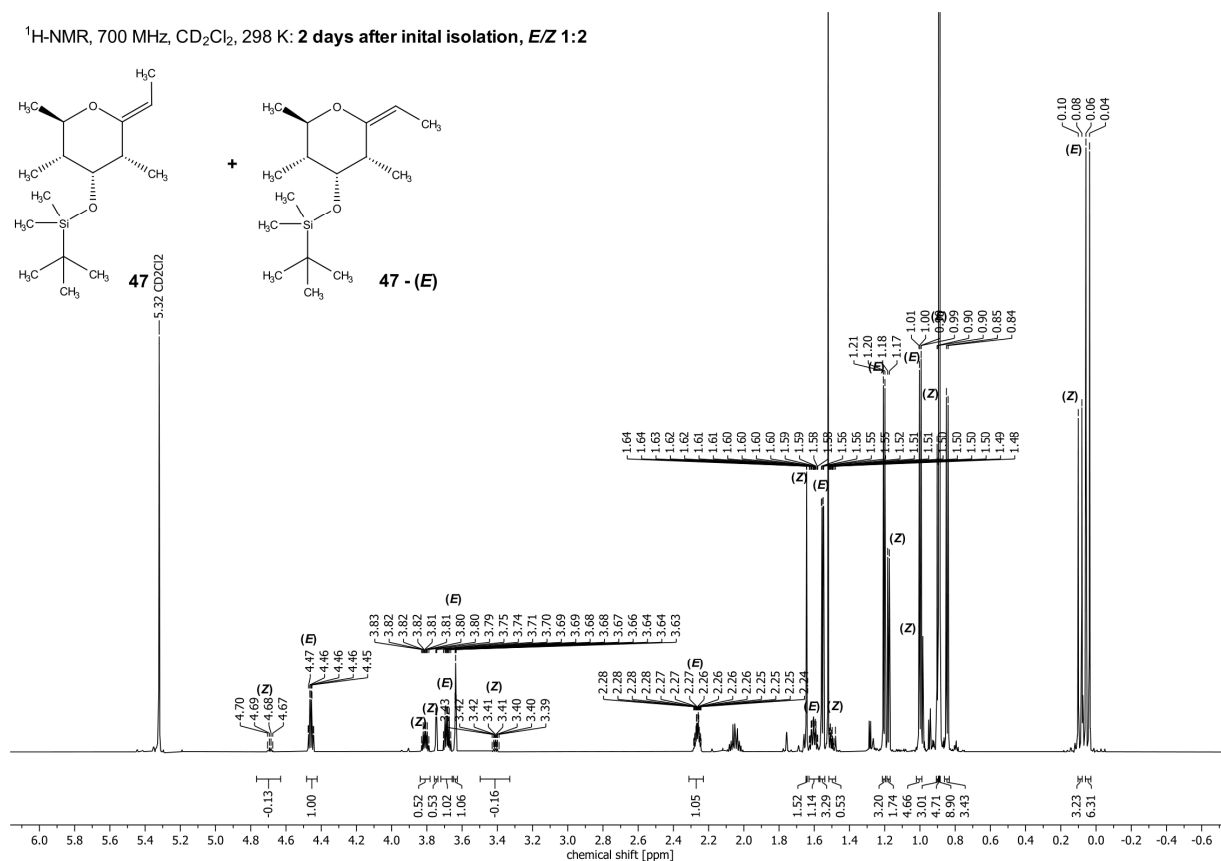

$^{13}\text{C-NMR}$ , 176 MHz,  $\text{CD}_2\text{Cl}_2$ , 298 K: 2 days after initial isolation, *E/Z* 1:2

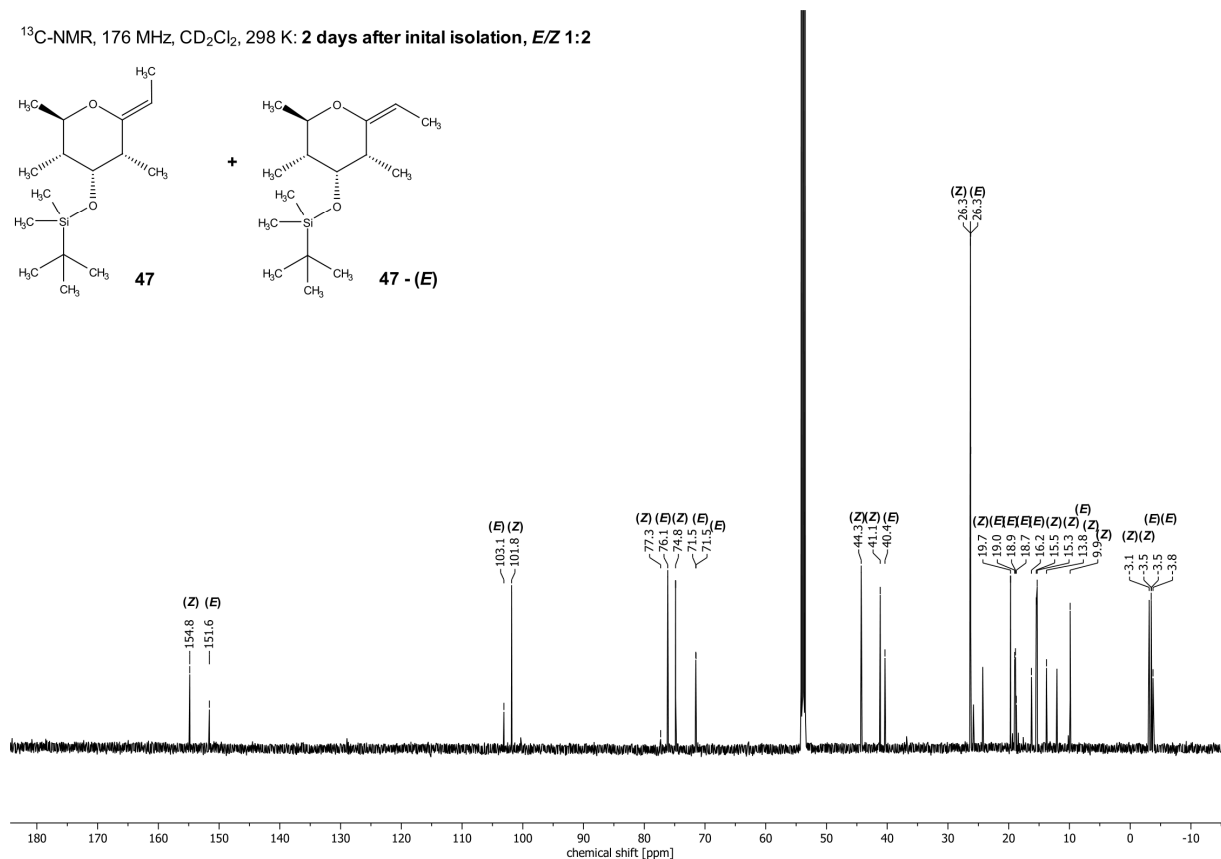

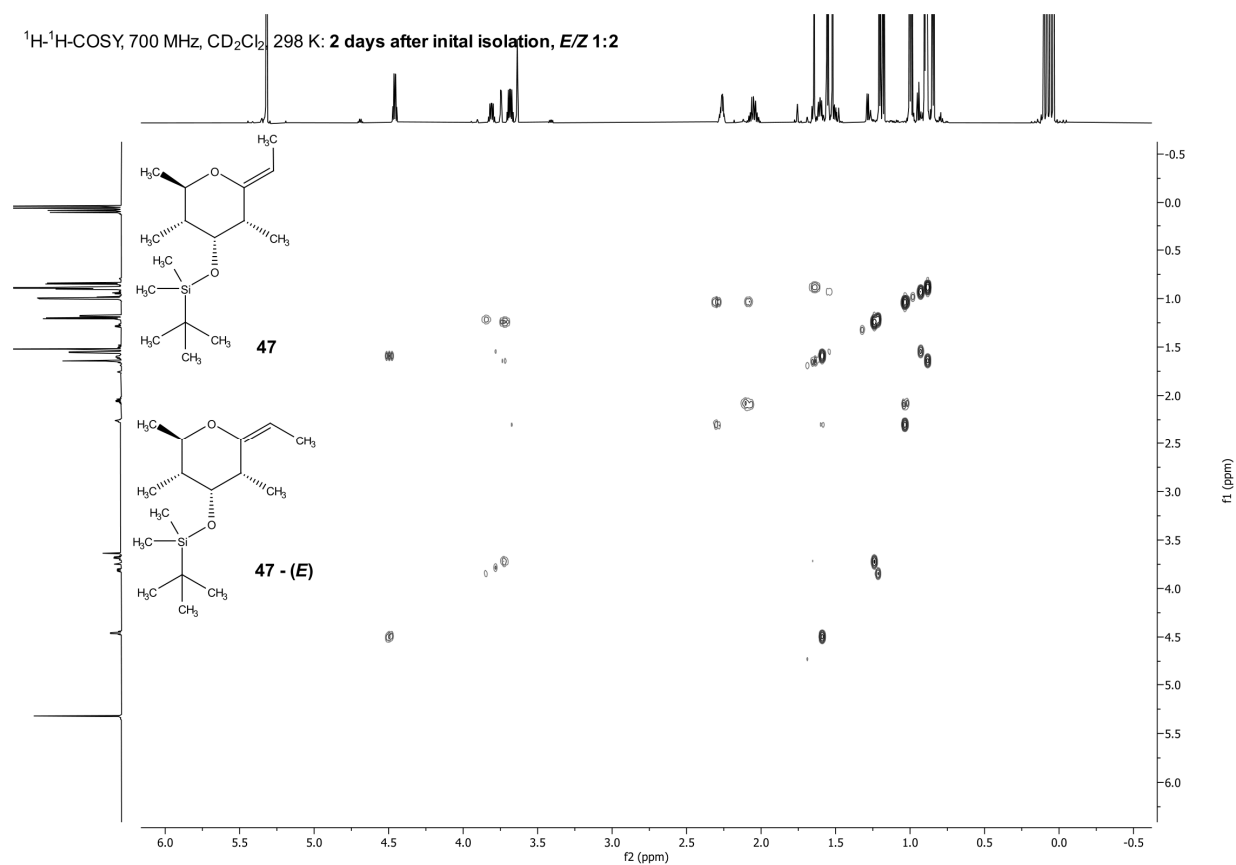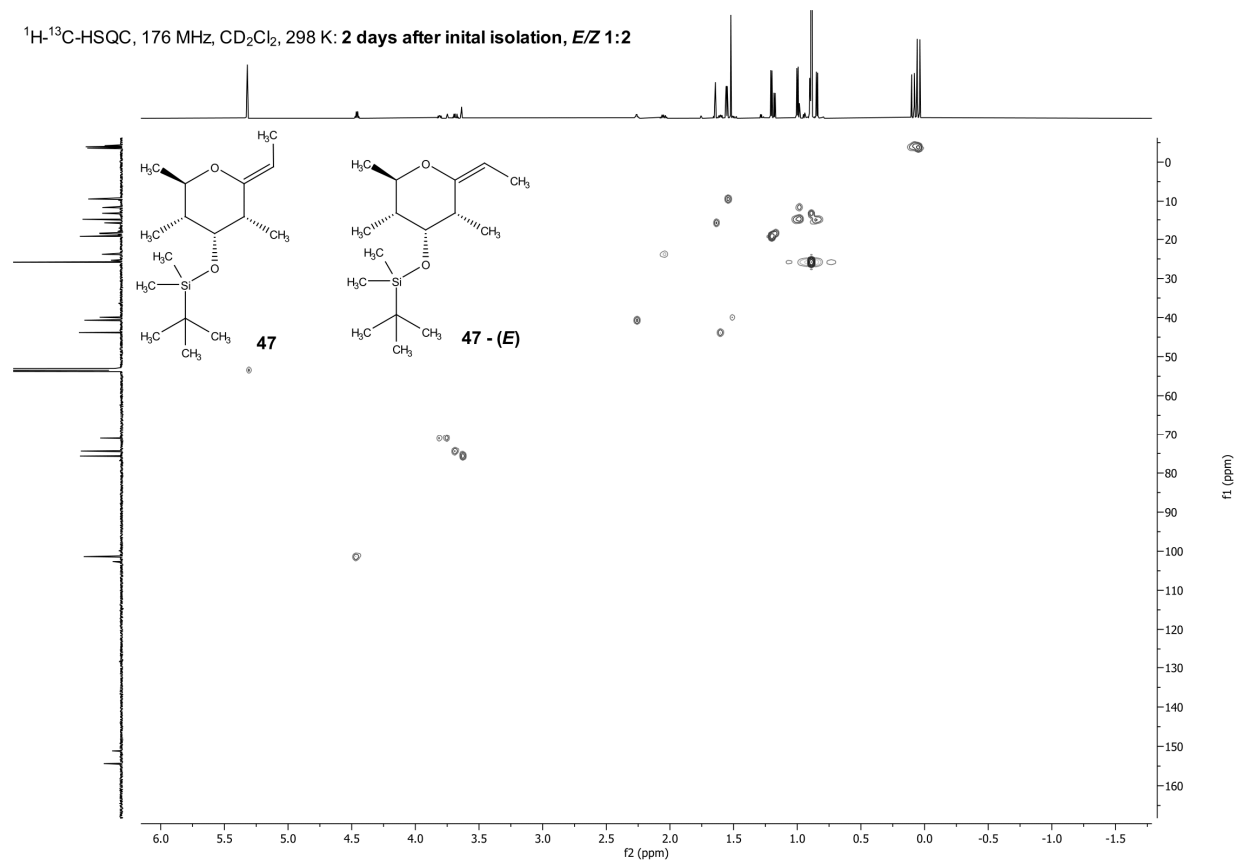

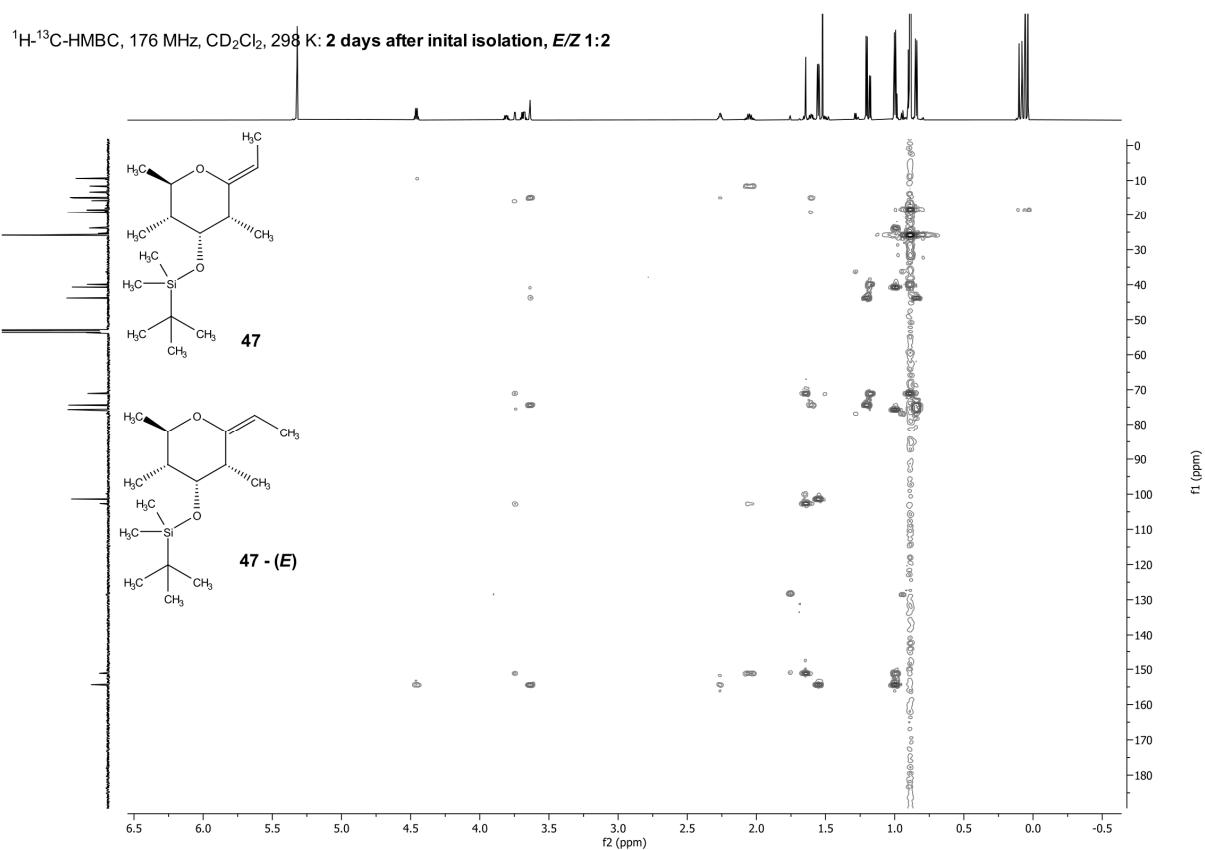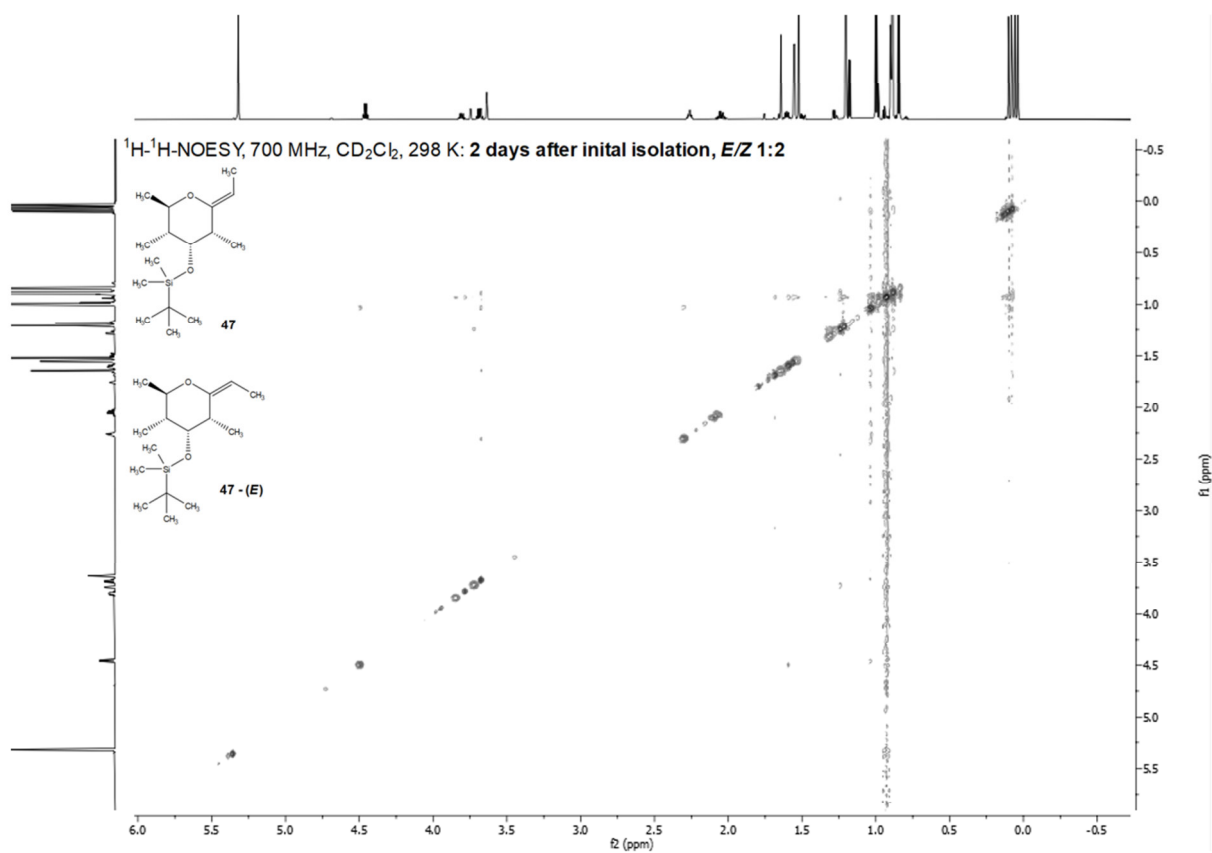

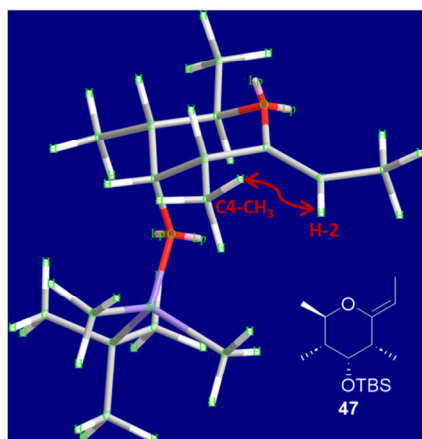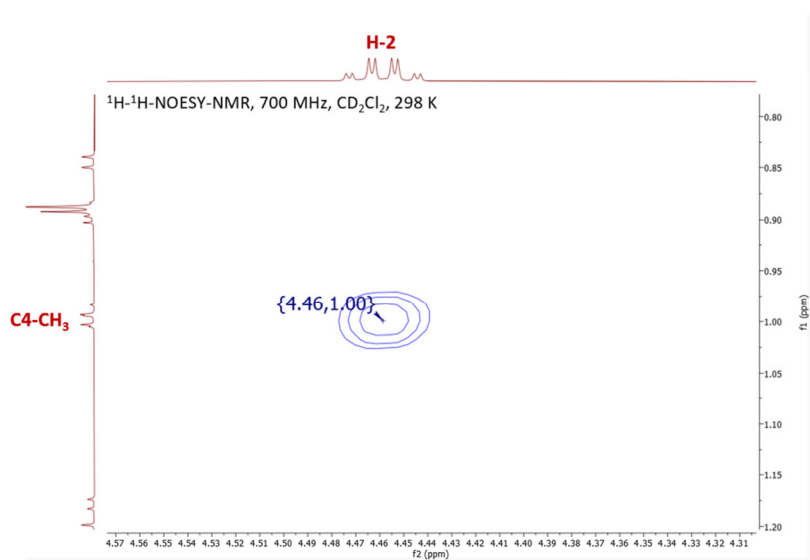

Supplement: d5ob00235d2.pdf [file d5ob00235d2.pdf]
