# Supplementary material for: Stereoselective synthesis of the pyran subunit of portentol
Source: Royal Society of Chemistry journal article supplement (doi:10.1039/d5ob00235d), 2025-01-01
Supplement: d5ob00235d1.pdf [file d5ob00235d1.pdf]

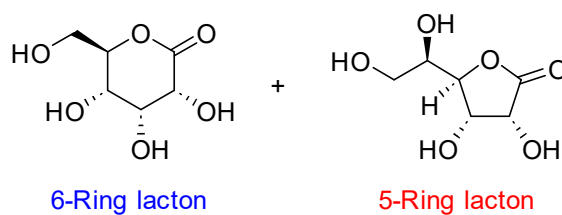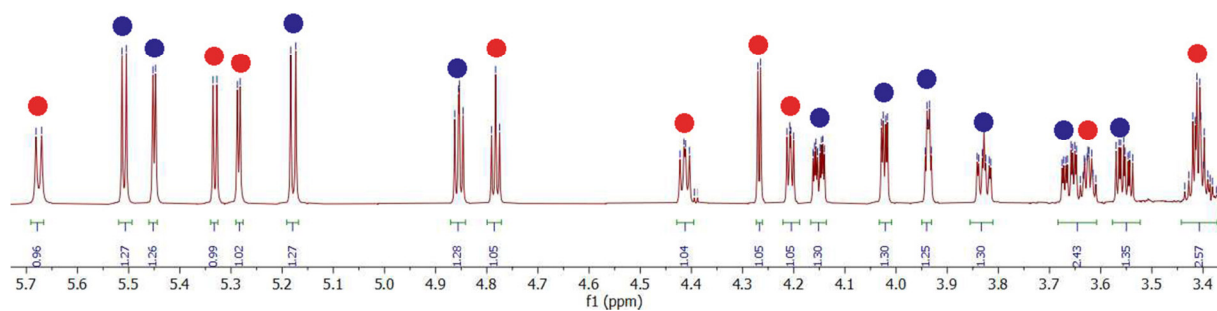

Figure: NMR spectrum of 1,5-lactone/ $\delta$ -lactone and 1,4-lactone/ $\gamma$ -lactone. Marked are the signals of the pyranose form (blue) and those of the furanose form (red).
